# Supplementary material
Source: PubMed Central journal article supplement (PMC5900343)
Supplement: ml7b00421_si_001.pdf [file ml7b00421_si_001.pdf]

# **Discovery of AG-120 (Ivosidenib): A First-in-Class Mutant IDH1 Inhibitor for the Treatment of IDH1-Mutant Cancers**

Janeta Popovici-Muller, René M. Lemieux, Erin Artin, Jeffrey O. Saunders, Francesco G. Salituro, Jeremy Travins, Giovanni Cianchetta, Zhenwei Cai, Ding Zhou, Dawei Cui, Ping Chen, Kimberly Straley, Erica Tobin, Fang Wang, Muriel D. David, Virginie Penard-Lacronique, Cyril Quivoron, Véronique Saada, Stéphane de Botton, Stefan Gross, Lenny Dang, Hua Yang, Luke Utley, Yue Chen, Hyeryun Kim, Shengfang Jin, Zhiwei Gu, Gui Yao, Zhiyong Luo, Xiaobing Lv, Cheng Fang, Liping Yan, Andrew Olaharski, Lee Silverman, Scott Biller, Shin-San M. Su and Katharine Yen\*

## **Supporting Information**

### **Table of Contents**

|                                                           |    |
|-----------------------------------------------------------|----|
| Inhibitory Behavior of AG-120 .....                       | 2  |
| Supplementary Figures and Tables .....                    | 3  |
| Biochemistry and Cell Biology Assay Methods .....         | 9  |
| General Synthetic Procedures and Experimental Notes ..... | 14 |
| Synthetic Details and Characterization of Compounds ..... | 16 |
| Abbreviations .....                                       | 28 |
| Full Conflict of Interest Statement .....                 | 29 |
| References .....                                          | 31 |

### **Inhibitory Behavior of AG-120**

*In vitro*, AG-120 showed no time-dependence in IC<sub>50</sub> values between 1 and 16 hours of incubation for the mIDH1-R132 homodimer. AG-120 showed non-competitive inhibitory behavior with respect to the  $\alpha$ -KG substrate (Figure S1) and appears to be non-competitive with respect to the NADPH cofactor by standard equilibrium kinetic analysis (Figure S2). These observations are consistent with AG-120 being a rapid equilibrium inhibitor of the mIDH1-R132H homodimer in the presence or absence of substrate and cofactor. However, we cannot confirm this mode of action because NADPH is found to be tightly pre-bound in recombinant enzyme preparations.<sup>1</sup> Against the IDH1-WT homodimer, AG-120 showed uncompetitive inhibition with respect to the NADP cofactor (Figure S3). In the presence of increasing concentrations of AG-120, the observed rate constant ( $k_{obs}$ ) was a hyperbolic function of inhibitor concentration. Along with the observed time-dependence in IC<sub>50</sub> values between 1 and 16 hours, these data are consistent with AG-120 being a slow-binding inhibitor of the IDH1-WT homodimer (Figure S4).

With respect to the inhibition of the IDH1-WT enzyme, it is worth noting that mice with complete knock-out of *Idh1* showed completely normal development and fertility, although they were more susceptible to lethal doses of lipopolysaccharide than WT litter-mates,<sup>2</sup> suggesting that inhibition of IDH1 under homeostasis should be tolerable. Overall, preclinical profiling of AG-120 fully supports further clinical studies in the context of diseases associated with mutation of IDH1.

## Supplementary Figures and Tables

**Table S1. *In vitro* ADME and *in vivo* PK properties of AGI-14100**

|                      |                                                                   |                          |
|----------------------|-------------------------------------------------------------------|--------------------------|
| <i>In vitro</i> ADME | Liver microsomes E <sub>h</sub><br>Human/Mouse/Rat/Dog/Cynomolgus | 0.23/0.63/0.17/0.36/0.43 |
|                      | Caco2 A→B (10 <sup>-6</sup> cm/s)<br>/Efflux ratio                | 14.2/2.3                 |
|                      | hPXR % rifampicin @ 1/10 μM                                       | 69/70                    |
| <i>In vivo</i> PK    | CLp (L/hr/kg), from 1 mg/kg IV dose<br>Rat/Dog/Cynomolgus         | 0.45/0.12/0.22           |
|                      | t <sub>1/2</sub> (hr)<br>Rat/Dog/Cynomolgus                       | 9.9/32.5/12.5            |
|                      | F (%), from 10 mg/kg PO dose<br>Rat/Dog/Cynomolgus                | 44/18/43                 |

ADME, absorption, distribution, metabolism, and excretion; CLp, clearance; CYP, cytochrome P450; E<sub>h</sub>, microsome stability recorded as hepatic extraction ratio in liver microsomes; F, oral bioavailability; hPXR, human pregnane X receptor; IV, intravenous; PK, pharmacokinetic; PO, oral; t<sub>1/2</sub>, half-life.

**Table S2. Biochemical profiling of AG-120 against IDH2-wild type (WT) and mutant IDH2 (mIDH2)**

| Enzyme                          | Reverse (NADPH consumption), IC <sub>50</sub> (μM) |
|---------------------------------|----------------------------------------------------|
| mIDH2-R140Q/IDH2-WT (16 hr)     | No fit                                             |
| mIDH2-R140Q/mIDH2-R140Q (16 hr) | No fit                                             |
| mIDH2-R172K/IDH2-WT (16 hr)     | 72 (88%)                                           |
| mIDH2-R172K/mIDH2-R172K (1 hr)  | No fit                                             |

**Table S3. Profiling of AG-120 against dehydrogenases**

|                                      |                        |
|--------------------------------------|------------------------|
| Phosphoglycerate dehydrogenase       | No inhibition @ 100 μM |
| Lactate dehydrogenase A <sup>a</sup> | No inhibition @ 100 μM |
| Glutamate dehydrogenase              | No inhibition @ 100 μM |
| Glucose-6-phosphate dehydrogenase    | No inhibition @ 100 μM |

<sup>a</sup>Includes both forward and reverse reactions.

**Figure S1.** AG-120 showed non-competitive inhibition with respect to alpha-ketoglutarate ( $\alpha$ -KG)

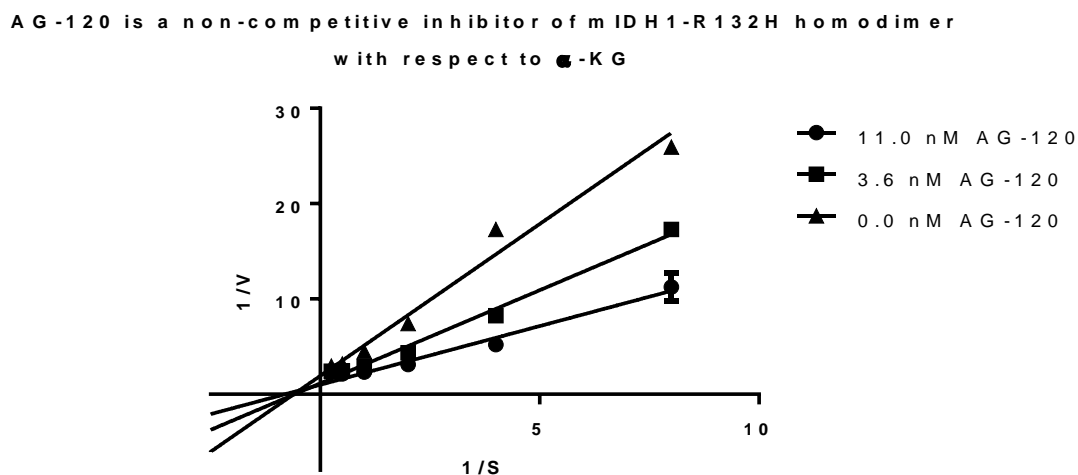

Linear regression of the reciprocal plots for each titration series of varying substrate versus varied fixed concentration of inhibitor intersects at a negative value on the x-axis, indicative of a non-competitive mode of inhibition.

**Figure S2.** AG-120 showed non-competitive inhibition with respect to the NADPH cofactor

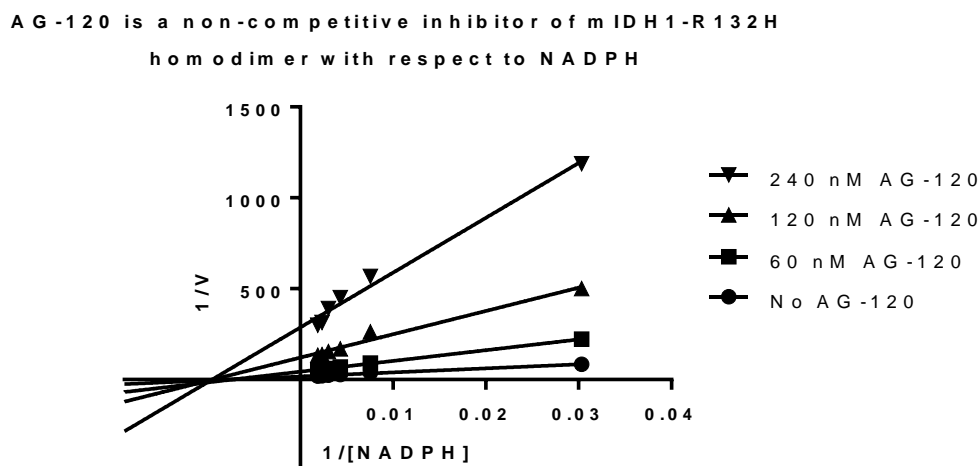

AG-120 is a non-competitive inhibitor of the mIDH1-R132H homodimer with respect to NADPH. Linear regression of the reciprocal plots for each titration series of varying cofactor versus fixed concentration of inhibitor intersects at a negative value on the x-axis, indicative of a non-competitive mode of inhibition. However, it is not conclusive that AG-120 can bind to the apo-form of the enzyme given that recombinantly expressed mIDH1-R132 enzymes exhibit low nM  $K_m$  values for NADPH and already contain pre-bound co-factor (observed in crystallography studies, data not shown).

**Figure S3.** AG-120 is an uncompetitive inhibitor of the IDH1-WT homodimer with respect to NADP

AG-120 is an un-competitive inhibitor of IDH1-WT with respect to NADP

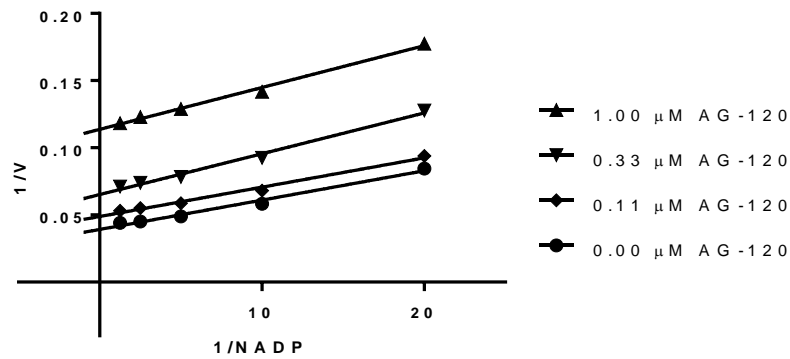

Linear regression of the reciprocal plots for each titration series of varying cofactor versus fixed concentration of inhibitor yields parallel lines, indicative of an uncompetitive mode of inhibition.

**Figure S4.** AG-120 is a slow-binding inhibitor of the IDH1-WT homodimer

AG-120 is a slow binding inhibitor of IDH1-WT homodimer

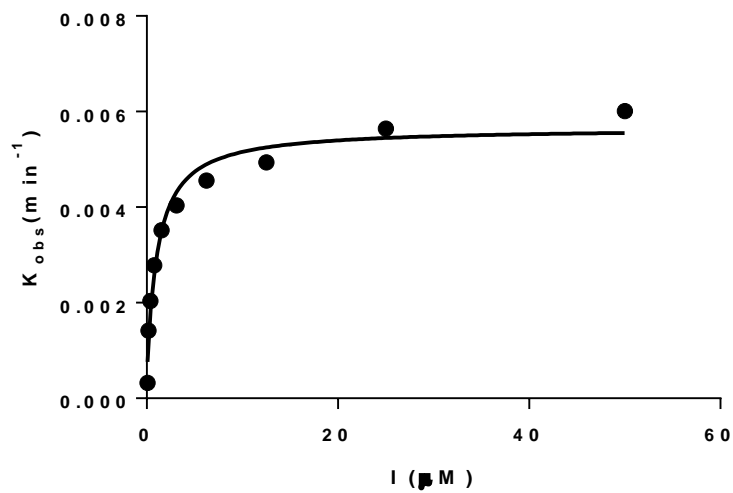

In the presence of increasing concentrations of AG-120, the observed rate constant ( $k_{obs}$ ) is a hyperbolic function of inhibitor concentration, indicative of AG-120 being a slow-binding inhibitor of the IDH1-WT homodimer.

**Table S4. *In vitro* ADME and *in vivo* PK properties of AG-120**

|                      |                                                                   |                           |
|----------------------|-------------------------------------------------------------------|---------------------------|
| <i>In vitro</i> ADME | Liver microsomes E <sub>h</sub><br>Human/Mouse/Rat/Dog/Cynomolgus | 0.15/0.12/0.13/stable/0.1 |
|                      | Caco2 A→B (10 <sup>-6</sup> cm/s)<br>/Efflux                      | 15/2                      |
|                      | hPXR % rifampicin 1/10 μM                                         | 2/21                      |
| <i>In vivo</i> PK    | CLp (L/hr/kg), from 1 mg/kg IV dose<br>Rat/Dog/Cynomolgus         | 0.2/0.02/0.2              |
|                      | t <sub>1/2</sub> (hr)<br>Rat/Dog/Cynomolgus                       | 8.9/19/5.3                |
|                      | F (%), from 10 mg/kg PO dose<br>Rat/Dog/Cynomolgus                | 42/21/49                  |

ADME, absorption, distribution, metabolism, and excretion; CLp, clearance; CYP, cytochrome P450; E<sub>h</sub>, microsome stability recorded as hepatic extraction ratio in liver microsomes; F, oral bioavailability; hPXR, human pregnane X receptor; IV, intravenous; PK, pharmacokinetic; PO, oral; t<sub>1/2</sub>, half-life.

**Table S5. AML diagnosis of bone marrow aspirates**

| Patient code | IDH mutation | Other mutations    | FAB    | Karyotype       | Sample source    |
|--------------|--------------|--------------------|--------|-----------------|------------------|
| 1            | WT           | FLT3-ITD<br>DNMT3A | AML M1 | Normal          | Peripheral blood |
| 2            | R132C        | NPM1               | AML M1 | Normal          | Peripheral blood |
| 3            | R132H        | None               | AML M4 | t(6:9)(p26;q34) | Bone marrow      |
| 4            | R132C        | FLT3-ITD<br>NPM1   | AML M1 | Normal          | Bone marrow      |
| 5            | R132H        | FLT3-ITD           | AML M1 | Normal          | Bone marrow      |

Diagnosis was morphologically confirmed according to the French–American–British (FAB) classification. Description of the karyotypes followed the International System for Human Cytogenetic Nomenclature.<sup>3</sup>

**Figure S5. AG-120 induces cellular differentiation in preclinical models.**

(A) Number of colony-forming units following treatment with AG-120 in primary human patient samples cultured in methylcellulose. (B) Flow cytometry analysis in mIDH1 primary human patient samples treated *in vitro* with AG-120 for 6 days. Solid green lines indicate AG-120 treatment, dashed black lines indicate DMSO control treatment. (C) Percentages of cell types in human acute myeloid leukemia bone marrow samples following 6 days of treatment with control (DMSO) or AG-120 (0.5, 1.0, and 5.0  $\mu$ M).

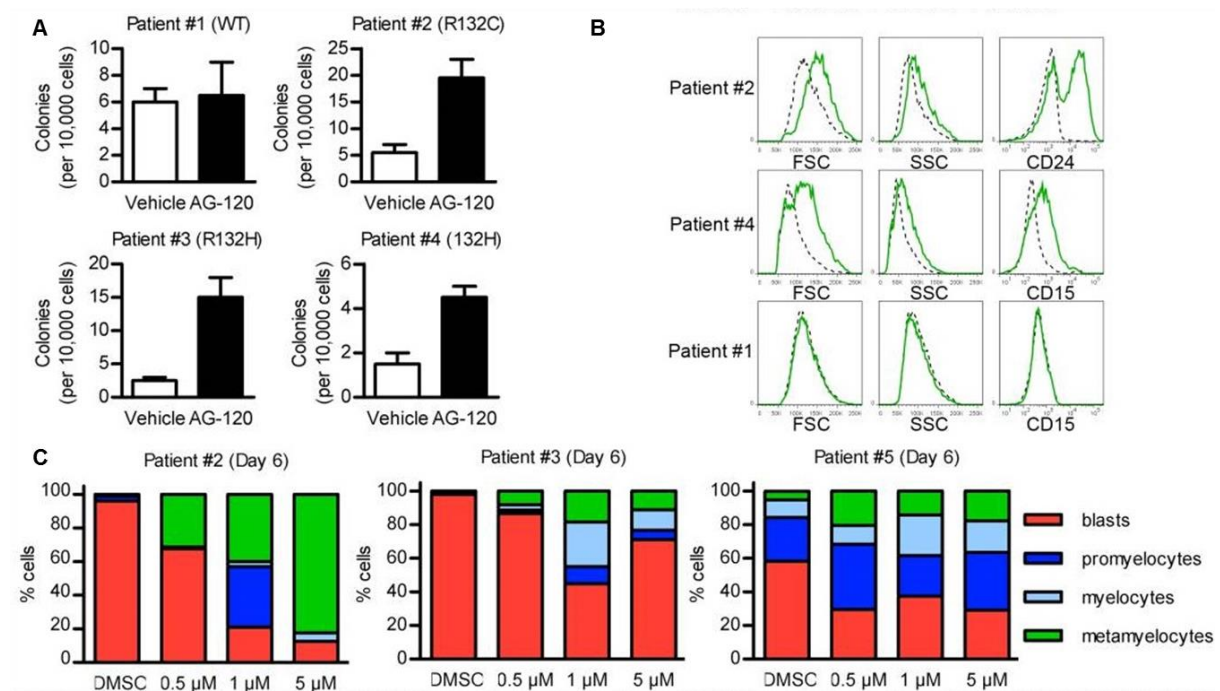

Enhanced ability of progenitor cells to form differentiated colonies, consistent with the onset of cellular differentiation, was observed for mIDH1, but not IDH1-WT, patient myeloblasts when grown for 12 days in methylcellulose in the presence of AG-120 (5  $\mu$ M) compared with vehicle control (DMSO, Figure S5A). Maturation of AML blasts was also evaluated by flow cytometry analysis for changes in cell-surface markers associated with myeloid differentiation (CD15, CD24, CD11b, and CD14). Treatment of mIDH1 AML cells with AG-120 always induced increases in one or more of these differentiation markers, although there was significant heterogeneity in the marker(s) induced, as well as in the kinetics of their appearance, with both features varying from one patient sample to another. This is illustrated in Figure S5B, which shows that treatment of mIDH1 blasts (from Patients #2 and #4) in liquid culture with AG-120 for 6 days induced an increase in the mean fluorescence

intensities for CD15 and CD24 (the most uniform features of the AG-120-induced differentiation effect across AML samples), and in the side scatter (SSC, granularity) and forward scatter (FSC, relative size) parameters. Treatment of IDH1-WT AML cells with AG-120 never induced increases in the expression level of any of these markers (e.g. Patient #1 in Figure 5B), indicating that AG-120 is effective solely on mIDH1 cells. These results were confirmed by cytology as a decrease in the number of blast cells and an increase in the number of more mature myeloid cells (myelocytes and metamyelocytes) in the mIDH1 patient samples following 6 days of treatment with AG-120 (0.5  $\mu$ M, 1  $\mu$ M, or 5  $\mu$ M) compared with DMSO control (Figure S5C). These data show that AG-120 induces myeloid differentiation in mIDH1-R132H and -R132C, but not IDH1-WT, primary human AML BM samples.

### Scheme S1. Synthesis of AG-120

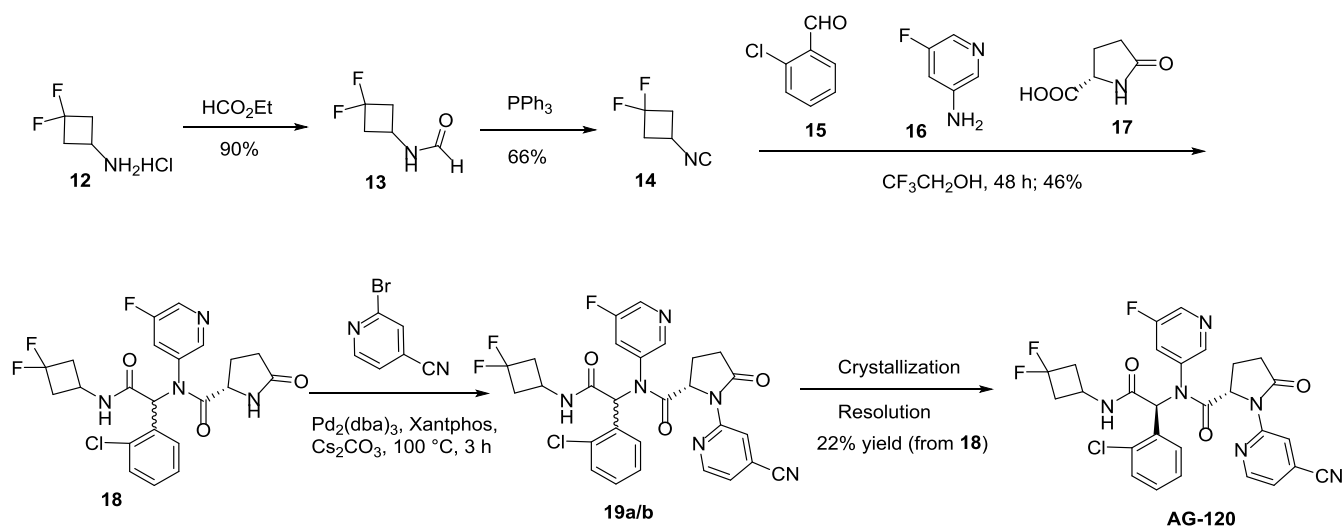

Starting from the commercially available 3,3-difluorocyclobutan-1-amine hydrochloride 12, isocyanide 14 was easily obtained following procedures reported in the literature (see Supporting Information references) and used without further purification in the next reaction. Ugi four-component reaction using isocyanide 14, o-Cl benzaldehyde 15, 5-fluoropyridin-3-amine 16, and (S)-5-oxopyrrolidine-2-carboxylic acid 17 gave phenyl glycine key intermediate 18 as a racemate at R2 in 46% isolated yield. Next, Pd-mediated coupling of 18 with 2-bromoisonicotinonitrile provided diastereomeric mixture 19 a/b, which after crystallization and concomitant chiral resolution provided AG-120 in 22% isolated yield from intermediate 18. This route proved to be an effective scalable synthesis that provided a multi-



hundred gram quantity of AG-120 to support additional *in vivo* pharmacology and preclinical toxicology studies.

## Biochemistry and Cell Biology Assay Methods

### *Expression and purification of WT and mutant IDH enzymes*

WT and mutant IDH1 and IDH2 enzymes were expressed and purified as previously reported.<sup>4</sup>

### *Determination of compound inhibition potency against the mIDH1-R132H enzyme reaction using a diaphorase/resazurin coupled system*

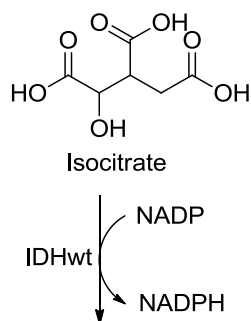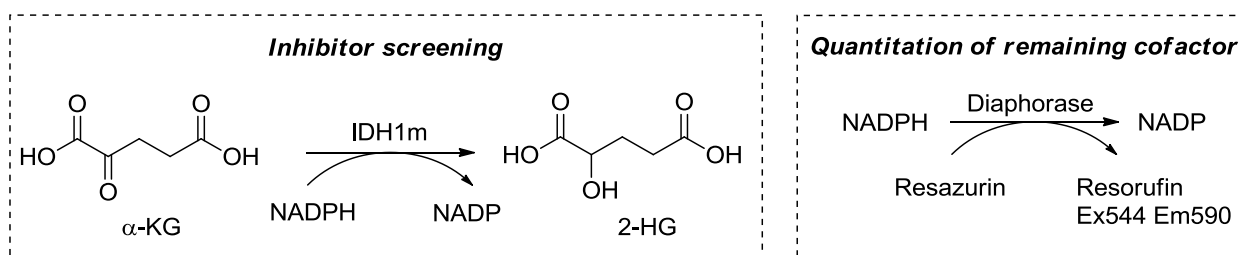

In the primary reaction, the reduction of  $\alpha$ -KG acid to D-2-hydroxyglutarate (2-HG) is accompanied by a concomitant oxidation of NADPH to NADP. The amount of NADPH remaining at the end of the reaction time is measured in a secondary diaphorase/resazurin reaction in which the NADPH is consumed in a 1:1 molar ratio with the conversion of resazurin to the highly fluorescent resorufin. Uninhibited reactions exhibit a low fluorescence at the end of the assay, while reactions in which the consumption of NADPH by mIDH1-R132H has been inhibited by a small molecule show a high fluorescence. The primary reaction was performed in a volume of 50  $\mu$ L 1X Buffer (150 mM NaCl, 20 mM Tris 7.5, 10 mM MgCl<sub>2</sub>, 0.05% w/v bovine serum albumin [BSA]), contained 2 nM mIDH1-R132H, 1 mM  $\alpha$ -KG, and 4  $\mu$ M NADPH, and was conducted for 60 minutes at 25°C. To perform the secondary reaction, 25  $\mu$ L of 1X buffer containing 36  $\mu$ g/mL diaphorase and 30 mM

resazurin was added to the primary reaction and incubated for a further 10 minutes at 25°C. Florescence was read on a Spectramax plate reader at Ex 544 Em 590. Recombinant protein was expressed and purified as previously described.<sup>5</sup> Compounds or compound dilutions were prepared in 100% dimethyl sulfoxide (DMSO) concentration and diluted 1:100 into the final reaction. mIDH1-R132C was assayed under similar conditions, with the exception that the 1X Buffer was 50 mM K<sub>2</sub>HPO<sub>4</sub> pH 6.5, 40 mM NaHCO<sub>3</sub>, 5 mM MgCl<sub>2</sub>, 10% glycerol, 0.03% w/v BSA.

*Assay of the IDH1-WT enzyme reaction for determination of inhibitor potency*

IDH1-WT enzyme was assayed in a modified version of the assay used for mIDH1-R132H. Since this enzyme converts NADP to NADPH stoichiometrically with the conversion of isocitrate to  $\alpha$ -KG, NADPH product can be continuously assayed by direct coupling to the diaphorase/resazurin system and reading resorufin production at Ex 544 Em 590. Assays were conducted in 50  $\mu$ L of 1X Buffer (150 mM NaCl, 20 mM Tris pH 7.5, 10 mM MgCl<sub>2</sub>, 0.05% (w/v) BSA, 2 mM beta-mercaptoethanol [B-ME]) containing 50  $\mu$ M NADP, 70  $\mu$ M DL-isocitrate, and 31.2 ng/mL IDH1-WT enzyme (reaction time 1 or 16 hours). The direct coupling system comprised 20  $\mu$ g/mL diaphorase and 40  $\mu$ M resazurin.

*Assay of the IDH2-WT enzyme reaction for determination of inhibitor potency*

Inhibitory potency of compounds against the IDH2-WT enzyme was determined in a coupled assay to diaphorase. In this assay, production of NADPH by IDH2-WT was linked to a concomitant reduction of resazurin to the highly fluorescent resorufin. Enzyme was diluted to 0.06  $\mu$ g/mL in 40  $\mu$ L 1X Assay Buffer (150 mM NaCl, 50 mM potassium phosphate pH 7, 10 mM MgCl<sub>2</sub>, 10% glycerol, 2 mM B-ME, 0.03% BSA), to which 1  $\mu$ L of compound was added in DMSO. The mixture was incubated for 16 hours at room temperature (RT). The reaction was started with the addition of 10  $\mu$ L of Substrate Mix (200  $\mu$ M isocitrate, 175  $\mu$ M NADP, 60  $\mu$ g/mL diaphorase, 200  $\mu$ M resazurin, in 1X Assay Buffer), and run for 30 minutes at RT. The reaction was halted with the addition of 25  $\mu$ L of 6% sodium dodecyl sulfate and read on a Spectramax Plate Reader at Ex544/Em590.

*Assay of the mIDH2-R140Q and mIDH2-R172K enzyme reaction for determination of inhibitor potency*

Inhibitory potency against the mIDH2-R140Q and mIDH2-R172K enzymes was determined in an endpoint assay in which the amount of NADPH remaining at the end of the reaction was measured by the addition of a large excess of diaphorase and resazurin. mIDH2-R140Q

was diluted to 0.25 µg/mL in 40 µL 1X Assay Buffer (150 mM NaCl, 50 mM potassium phosphate pH 7.5, 10 mM MgCl<sub>2</sub>, 10% glycerol, 2 mM B-ME, 0.03% BSA) and incubated for 16 hours at 25°C in the presence of 1 µL of compound in DMSO. The reaction was started with the addition of 10 µL of Substrate Mix (20 µM NADPH, 8 µM α-KG, in 1X Assay Buffer) and incubated for 1 hour at 25°C. Then, remaining NADPH was measured by the addition of 25 µL of Detection Mix (36 µg/mL diaphorase, 18 µM resazurin in 1X Assay Buffer), incubated for 5 minutes at 25°C, and read as described above. mIDH2-R172K was assayed as for mIDH2-R140Q with the following modifications: 1.25 µg/mL of protein was used, the Substrate Mix contained 50 µM NADPH and 6.4 µM α-KG, and the compound was incubated for 1 hour before starting the reaction.

### *Cell lines*

Human glioblastoma astrocytoma (U87MG) pLVX-IDH1-R132H was generated in-house using U87MG (ATCC, #HTB-14) cells and pLVX-IRESNeo. High titers of recombinant, replication-incompetent virions were generated using a Lenti-X HTX Packing system (Clontech), in which pLVX vector containing the IDH1-R132H gene was co-transfected along with a Lenti-X HTX Packing Mix (Cat# 631249, Clontech) into the Lenti-X 293T cell line (Cat#632180, Clontech). All procedures were performed according to the manufacturer's protocol. Cells were selected and maintained in 500 µg/mL Geneticin in RPMI medium with 10% fetal bovine serum (FBS) and penicillin/streptomycin.

HT1080 (ATCC, #CCL-121), COR-L 105 (ECACC, # 92031918), and HCCC-9810 (Shanghai Cell Bank, ChemPartner) cells were maintained in RPMI medium with 10% FBS and penicillin/streptomycin.

Neurospheres (603) were derived from glioma patients who underwent tumor resection at the Memorial Sloan-Kettering Cancer Center (MSKCC) by the Ingo Mellinghoff laboratory. All human samples were collected after patients signed informed consent according to MSKCC institutional review board guidelines. Cells were maintained as spheres in Human Neurocult media (Stem Cell Technologies) with Neurocult supplement, 1% Primocin, 1% Normocin, 0.0002% Heparin, 20 ng/mL epidermal growth factor and 10 ng/mL basic fibroblast growth factor.

### *Cell assays*

Cells were seeded in their respective growth media at a density of 5000 (U87MG, HCCC-9810, COR-L 105) or 2500 (HT1080) cells/well into 96-well microtiter plates and incubated overnight at 37°C and 5% CO<sub>2</sub>. The next day, AG-120 was prepared in 100% DMSO as a 10 mM stock and then diluted in media for a final concentration of 0.1% DMSO. Highest concentration dose was 3 µM. Medium was removed from the cell plates and 200 µL of the compound dilutions were added to each well. For neurospheres, compounds and cells (40,000/well) were plated together at the same time. After 48 hours of incubation with compound at 37°C, 100 µL of media was removed from each well and analyzed as described below. The cell plates were then allowed to incubate another 24 hours. At 72 hours post compound addition, a 10 mL/plate of Promega Cell Titer Glo reagent was thawed and mixed. The cell plate was removed from the incubator and allowed to equilibrate to RT. Then 100 µL of reagent was added to each well of media. The cell plate was placed on an orbital shaker for 10 minutes and then allowed to sit at RT for 20 minutes. The plate was then read for luminescence with an integration time of 500 ms to determine any compound effects on growth inhibition (half maximal inhibition of cell proliferation, GI<sub>50</sub>).

Cellular half-maximal inhibitory concentration (IC<sub>50</sub>), 90% maximal IC (IC<sub>90</sub>), percent maximum 2-HG inhibition, and growth inhibition were calculated as described below.

The concentrations of 2-HG in media were determined using a non-validated liquid chromatography–tandem mass spectrometry (LC-MS/MS) method.

The following protein precipitation method was used for sample preparation:

- A 30 µL aliquot of 80:20 methanol (MeOH):H<sub>2</sub>O extract was mixed with 170 µL of acetonitrile (MeCN) with internal standard (<sup>13</sup>C5-2-HG, 0.2 µg/mL).
- Samples were vortexed for 5 minutes to mix well and centrifuged at 400 rpm for 10 minutes.
- 100 µL of supernatant was transferred and diluted with 100 µL of H<sub>2</sub>O and mixed well.
- 40 µL was injected onto the LC-MS/MS for analysis.

The instrument setup consisted of a Thermo TSQ Vantage mass spectrometer equipped with Accela high-performance liquid chromatography (HPLC) pumps. An isocratic gradient method was used at a flow rate of 1 mL/min. The HPLC column used was Bio-Rad, Aminex

Fast Acid Analysis, 100 mm × 7.8 mm, 9 μm. 2-HG and stable isotope labeled 2-HG (<sup>13</sup>C-2-HG – used as internal standard) were ionized under negative ion spray mode and detected through the multiple-reaction monitoring of a mass transition pair at m/z = 147.0/129.0 and 152.0/134.0, respectively. Stock solutions of 2-HG and <sup>13</sup>C-2-HG were prepared separately in H<sub>2</sub>O at a target concentration of 1 mg/mL as free acid. Stock working solutions of 2-HG ranging from 10 ng/mL to 30,000 ng/mL were made in phosphate-buffered saline and were used to prepare calibration standards and quality control samples (QCs). The internal standard solution was prepared in MeCN at a concentration of 200 ng/mL. Samples were run with two standard curves and QCs. Standard curves and QCs were acceptable, ie, two-thirds of the QCs had a precision and accuracy within 15% of theoretical values except in lower limit of quantitation within 20%; a standard curve has a coefficient of determination (R<sup>2</sup>) value >0.98 in linear regression. The peak area ratios of the analyte relative to the internal standard were used for 2-HG quantitation. Linearity was achieved in the 2-HG concentration range from 10 to 30,000 ng/mL for cell pellets.

#### *Generation of HT1080 mIDH1-R132C xenografts*

All animal studies were approved by the Institutional Animal Care and Use Committee and conducted in compliance with all national and local guidelines and regulations.

HT1080 mIDH1-R132C cells were grown and 3 × 10<sup>6</sup> cells were inoculated subcutaneously on the flank of female BALB/c mice. When tumors reached approximately 200 mm<sup>3</sup> the mice were randomized into dosing groups according to tumor size and treated with AG-120. Mice were dosed orally by gavage with a single dose of AG-120 at 50 or 150 mg/kg (n = 21 per dose group). Blood and tumor tissue samples were collected at 1, 3, 6, 12, 24, 48, and 72 hours following the dose (n = 3 at each time point) and were analyzed for AG-120 and 2-HG via LC-MS/MS.

#### *Primary patient sample differentiation*

##### Primary AML samples

Peripheral blood (PB) or bone marrow (BM) aspirate samples were obtained at the time of diagnosis at the Gustave Roussy Institut (Villejuif, France). Informed consent was obtained from all patients in accordance with the Declaration of Helsinki. AML diagnosis was morphologically proven according to the French–American–British classification.

Description of the karyotypes followed the International System for Human Cytogenetic Nomenclature.<sup>3</sup> Immunophenotyping of the blasts was performed using the following

antibodies: phycoerythrin (PE)-CD34 (BD Pharmingen), allophycocyanin (APC)-CD38 (BD Pharmingen), and PECy7-CD45 (clone H130, BD Pharmingen).

#### IDH mutational status

Genomic DNA was purified from diagnostic PB and/or BM specimens using the Qiagen DNeasy extraction kit following the manufacturer's instructions. IDH1/2 mutational status was analyzed by PCR amplification of IDH genes (exon 4 genomic regions, containing the mutational hotspot codon mIDH1-R132 and codons mIDH2-R140 and -R172) and direct sequencing, as reported.<sup>6-7</sup>

#### Ex vivo AG-120 treatment

Patient PB or BM samples were sorted according to their immunophenotype using an Influx cell sorter (BD Biosciences). Live cells were cultured in 48-well tissue culture plates (Becton Dickinson) in serum-free medium supplemented with cytokines (human interleukin 3, interleukin 6, stem cell factor, thrombopoietin, erythropoietin, FMS-like tyrosine kinase 3 ligand, granulocyte-macrophage colony-stimulating factor, and granulocyte colony-stimulating factor, all from PeproTech) either in the presence of DMSO (0.05% v/v, used as a vehicle control) or in the presence of increasing doses of AG-120 (0.5, 1, and 5  $\mu$ M) over a 6-day time course.

#### Cytometry

Cytometric analysis was performed on a BD Biosciences LSRII using the anti-CD24 (clone SN3, eBioscience SAS) and anti-CD15 (clone VIMC6, Miltenyi Biotec SAS) antibodies.

#### Methylcellulose assays

Primary AML samples ( $2 \times 10^4$  cells from PB or BM) were plated in methylcellulose-based medium (Methocult H4434, StemCell Technologies) in duplicate 35 mm dishes per condition in the presence of AG-120 (5  $\mu$ M) or vehicle (0.05% v/v). Dishes were incubated in a humidified incubator at 37°C. Colonies containing at least 30 cells were counted at day 12.

### **General Synthetic Procedures and Experimental Notes**

In the following examples, the chemical reagents were purchased from commercial sources (such as Alfa, Acros, Sigma Aldrich, TCI, and Shanghai Chemical Reagent Company) and used without further purification. Flash chromatography was performed on an Isolera One

column (Biotage) with silica gel particles of 200–300 mesh. Analytical and preparative thin-layer chromatography (prep-TLC) plates were HSGF 254 (0.15–0.2 mm thickness, Shanghai Anbang Company). Nuclear magnetic resonance (NMR) spectra were recorded using an AMX-300 or AMX-400 NMR spectrometer (Bruker). Chemical shifts were reported in parts per million (ppm,  $\delta$ ) downfield from tetramethylsilane. Mass spectra were run with electrospray ionization (ESI) from an LCT TOF mass spectrometer (Waters). High-resolution mass spectra were run with ESI from a Premier UPLC-Q-TOF mass spectrometer (Waters). HPLC chromatographs were recorded on an LC-20AHT (Shimadzu) liquid chromatography system (column: Ultimate 4.6 mm  $\times$  50 mm [Welch], 5  $\mu$ m, mobile phase A:H<sub>2</sub>O/MeCN/trifluoroacetic acid (TFA) = 90/10/0.1; mobile phase B: MeCN/H<sub>2</sub>O/TFA = 90/10/0.1). Chiral HPLC was recorded on an LC-2010A HT (Shimadzu) system (column: Chiralpak IB 4.6 mm  $\times$  50 mm [Daicel], 5  $\mu$ M, mobile phase: hexane/ethanol (EtOH) = 80/20). Microwave reactions were run on an Initiator 2.5 Microwave Synthesizer (Biotage).

*General procedure for the Ugi reaction*<sup>8-15</sup>

A mixture of aldehyde (3.5 mmol) and aniline (3.5 mmol) in MeOH (8 mL) was stirred at RT for 30 minutes. Then, acid (3.5 mmol) was added and the reaction mixture was stirred for another 30 minutes. Isocyanide (3.5 mmol) was then added. The resulting mixture was then stirred at RT overnight and quenched by addition of H<sub>2</sub>O. The resulting mixture was partitioned between ethyl acetate (EtOAc) and H<sub>2</sub>O. The organic layer was separated, washed with brine, dried over anhydrous Na<sub>2</sub>SO<sub>4</sub>, and then concentrated. The residue was purified by silica gel column chromatography using dichloromethane (DCM)/MeOH as eluent to afford the desired product.

*General procedure for the Buchwald reaction*<sup>16-19</sup>

A mixture of amine (0.30 mmol), aryl bromide (0.30 mmol), Cs<sub>2</sub>CO<sub>3</sub> (129 mg, 0.39 mmol), Pd<sub>2</sub>(dba)<sub>3</sub> (18 mg, 0.02 mmol), and Xantphos (9.4 mg, 0.02 mmol) in 1,4-dioxane (10 mL) was stirred under nitrogen atmosphere at 80°C overnight. After filtration, the filtrate was concentrated in high vacuo and the residue was purified by prep-TLC to give the desired products.

## Synthetic Details and Characterization of Compounds

Compound **2** was prepared according to the following scheme, using the following protocol:

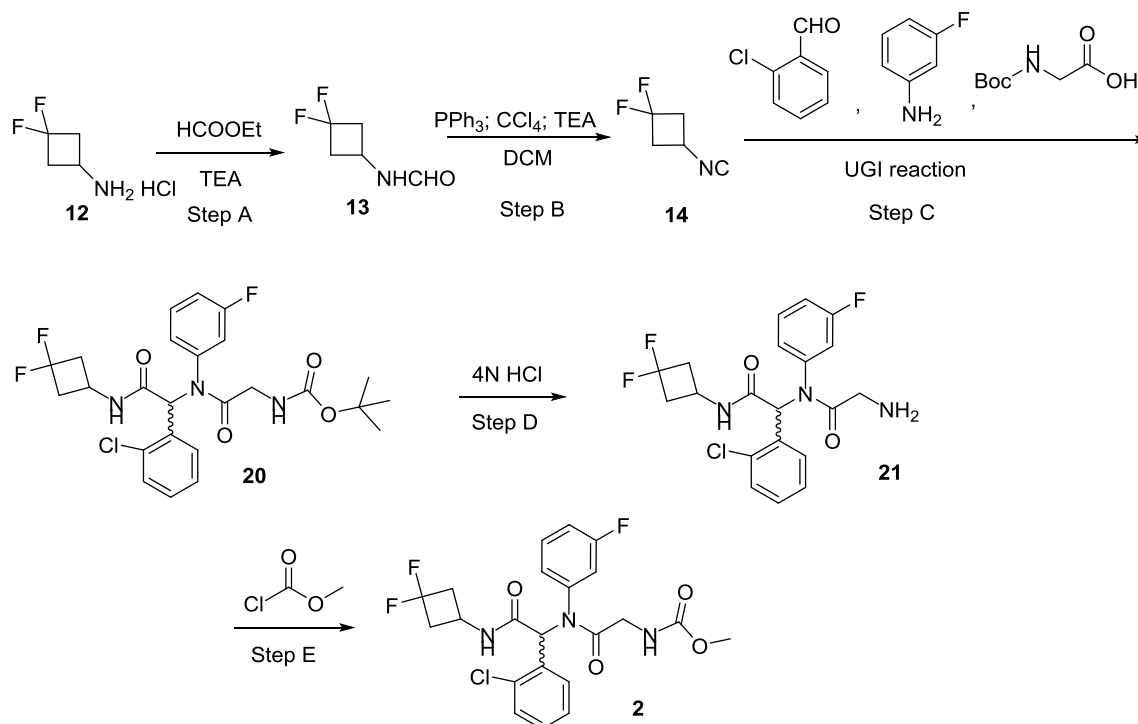

**Step A: N-(3,3-difluorocyclobutyl)formamide (13).** A 2-L sealed reactor was charged with 3,3-difluorocyclobutanamine hydrochloride (**12**) (87 g, 0.61 mol), trimethylamine (TEA; 170 mL, 1.22 mol), ethyl formate (HCOOEt; 850 mL, 10.57 mol). The mixture was heated at 85°C overnight. The reaction mixture was cooled and filtered. The cake was washed with EtOAc (3 × 200 mL), and the combined filtrate was concentrated under reduced pressure. The residual solid was dissolved in EtOAc (600 mL) and filtered. The filtrate was concentrated under reduced pressure. The residue was triturated with *n*-hexane (400 mL) and filtered. The solid was collected and dried to afford 74 g desired product (**13**) as off-white solid (86% yield).

**Step B: 1,1-Difluoro-3-isocyanocyclobutane (14).** To a solution of N-(3,3-difluorocyclobutyl)formamide (**13**) (37 g, 0.274 mol) and triphenylphosphine (PPh<sub>3</sub>; 79.1 g, 0.301 mol) in DCM (500 mL) were added CCl<sub>4</sub> (42.1 g, 0.274 mol) and TEA (27.73 g, 0.274 mol). The reaction mixture was stirred overnight at 45°C under the atmosphere of N<sub>2</sub>. The resulting mixture was evaporated *in vacuo* at 0°C. The residue was suspended in diethyl ether (Et<sub>2</sub>O) (50 mL) at 0°C for 30 minutes and filtered. The precipitate was filtered and the filtrate was evaporated to ~50 mL at 0°C under reduced pressure. The residue was purified by



column chromatography eluting with Et<sub>2</sub>O to afford the desired product **14** as light brown oil (36 g [67% purity, based on <sup>1</sup>H NMR], 75% crude yield).

**Step C: Tert-butyl 2-((1-(2-chlorophenyl)-2-(3,3-difluorocyclobutylamino)-2-oxoethyl)(3-fluorophenyl)amino)-2-oxoethylcarbamate (20).** A mixture of 2-chlorobenzaldehyde (0.31 mL, 2.74 mmol) and 3-fluoroaniline (0.26 mL, 2.74 mmol) in dry MeOH (2 mL) was stirred at RT for 0.5 hour, followed by addition of 2-(tert-butoxycarbonylamino)acetic acid (479 mg, 2.74 mmol). The resulting mixture was stirred at RT for 10 minutes followed by addition of 3,3-difluoroisocyanobutane (67% purity, 500 mg, 4.27 mmol). The mixture was stirred at RT overnight. The resulting mixture was filtered to give the desired compound (717.7 mg, 41.9 % yield). <sup>1</sup>H NMR (400 MHz, DMSO-d<sub>6</sub>): δ 8.88 (m, 1H), 7.61 (m, 1H), 7.42 (d, *J* = 7.9 Hz, 1H), 7.32–6.42 (m, 7H), 6.33 (s, 1H), 4.12 (m, 1H), 3.72–3.48 (m, 1H), 3.28–3.23 (m, 1H), 3.05–2.75 (m, 2H), 2.55–2.50 (m, 1H), 2.50–2.40 (m, 1H), 1.37 (s, 9H). MS: 526.2 (M+1)<sup>+</sup>.

**Step D: 2-Amino-N-(1-(2-chlorophenyl)-2-(3,3-difluorocyclobutylamino)-2-oxoethyl)-N-(3-fluorophenyl) acetamide hydrochloride (21).** A mixture of tert-butyl 2-((1-(2-chlorophenyl)-2-(3,3-difluorocyclobutylamino)-2-oxoethyl)(3-fluorophenyl)amino)-2-oxoethylcarbamate (500 mg) in 4N HCl in EtOAc (20 mL) was stirred at RT overnight. The mixture was filtered to give the desired product (quant. yield). MS: 426.2 (M+1)<sup>+</sup>.

**Step E: Compound 2** To a solution of 2-amino-N-(1-(2-chlorophenyl)-2-(3,3-difluorocyclobutylamino)-2-oxoethyl)-N-(3-fluorophenyl) acetamide hydrochloride **21** (100 mg) in saturated aqueous NaHCO<sub>3</sub> (10 mL) and tetrahydrofuran (THF) (10 mL) was added methyl carbonochloridate (1 mL). The mixture was stirred at RT overnight. Saturated aqueous NaHCO<sub>3</sub> was added to the mixture until pH reached 9 and the mixture then extracted by EtOAc. Combined organic layers were dried, filtered, and concentrated. The residue was purified by flash chromatography using DCM/MeOH (V:V, 20:1) as eluent to give the desired product (66.5 mg, 60% yield). <sup>1</sup>H NMR (400 MHz, DMSO-d<sub>6</sub>): δ 8.83 (m, 1H), 7.63 (m, 1H), 7.39 (d, *J* = 7.8 Hz, 1H), 7.27–7.13 (m, 3H), 7.05 (m, 2H), 6.84 (d, *J* = 7.6 Hz, 1H), 6.72 (m, 1H), 6.28 (s, 1H), 4.09 (dt, *J* = 8.0, 6.1 Hz, 1H), 3.58 (m, 1H), 3.49 (s, 3H), 3.31–3.24 (m, 1H), 2.97–2.84 (m, 2H), 2.57 (m, 1H), 2.40 (m, 1H). High-resolution mass spectrometry (HRMS) (ESI) calculated for C<sub>22</sub>H<sub>21</sub>ClF<sub>3</sub>N<sub>3</sub>O<sub>4</sub> [M+ H]<sup>+</sup> 484.1251, found 484.1258.

*Compound 1* was prepared via the procedure described above;  $^1\text{H}$  NMR (400 MHz,  $\text{CDCl}_3$ ),  $\delta$  7.16-6.74 (m, 8H), 6.34 (s, 1H), 5.54 (s, 1H), 5.54-5.26 (m, 1H), 3.88-3.64 (m, 6H), 2.38 (s, 3H), 1.98-1.62 (m, 4H), 1.42-0.98 (m, 6H); HRMS(ESI) calculated for  $\text{C}_{25}\text{H}_{30}\text{FN}_3\text{O}_4$  [ $\text{M} + \text{H}$ ] $^+$  456.2220, found 456.2307.

*Compound 3* was prepared according to the following scheme, using the following protocol:

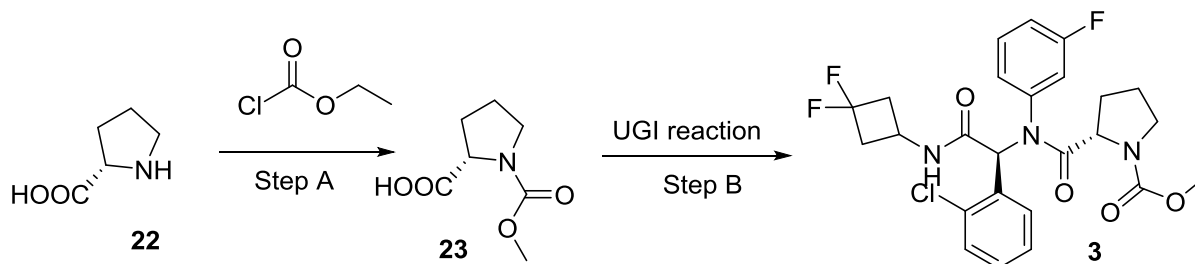

**Step A: (S)-1-(methoxycarbonyl)pyrrolidine-2-carboxylic acid.** Methyl carbonochloridate (1.65 g, 17.4 mmol) was added to a solution of (S)-pyrrolidine-2-carboxylic acid (**22**) (1 g, 8.7 mmol) in a solution of THF (10 mL) and saturated  $\text{NaHCO}_3$  (10 mL) at  $0^\circ\text{C}$  and stirred at RT overnight. The mixture was extracted with EtOAc and the organic layer was concentrated to afford the desired product **23** (1.2 g, 80% yield) as colorless oil.

**Step B: Compound 3.** The product was synthesized via the *general procedure* for the Ugi reaction set forth above.  $^1\text{H}$  NMR (400 MHz,  $\text{CDCl}_3$ ):  $\delta$  7.63 (s, 0.4H), 7.37-7.31 (m, 2H), 7.27-7.07 (m, 3H), 7.03-6.86 (m, 2H), 6.73-6.39 (m, 1H), 6.13 (s, 0.6H), 4.39 (m, 1H), 4.23-4.08 (m, 1H), 3.72 (m, 3H), 3.58-3.37 (m, 2H), 3.12-2.92 (m, 2H), 2.79-2.31 (m, 2H), 2.09-1.86 (m, 3H), 1.77-1.66 (m, 1H). Integration (24) for  $\text{C}_{25}\text{H}_{25}\text{ClF}_3\text{N}_3\text{O}_4$  due to one active proton (NH) not shown in  $\text{CDCl}_3$ . HRMS (ESI) calculated for  $\text{C}_{25}\text{H}_{25}\text{ClF}_3\text{N}_3\text{O}_4$  [ $\text{M} + \text{H}$ ] $^+$  524.1564, found 524.1560.

Compound 4 was prepared according to the following scheme, using the following protocol:

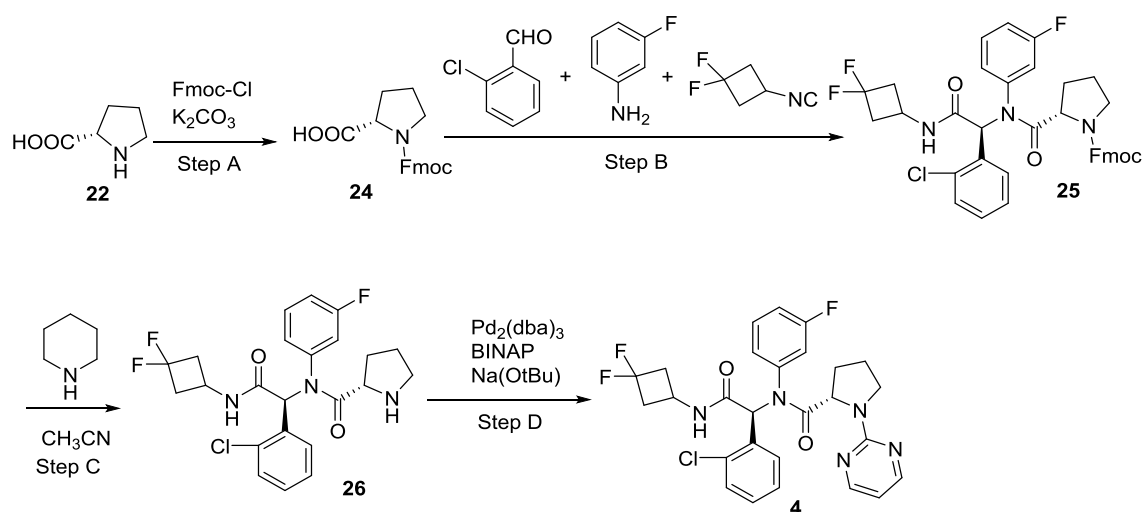

**Step A: (S)-1-(((9H-fluoren-9-yl)methoxy)carbonyl)pyrrolidine-2-carboxylic acid (24).** (S)-pyrrolidine-2-carboxylic acid **22** (1 g, 8.7 mmol) was dissolved in 1,4-dioxane (4 mL) and H<sub>2</sub>O (15 mL), and cooled to 0°C. K<sub>2</sub>CO<sub>3</sub> (3.24 g, 23 mmol) was added, and then (9H-fluoren-9-yl)methyl chloroformate (2.3 g, 8.3 mmol) was added in portions. The mixture was stirred at RT overnight and H<sub>2</sub>O (10 mL) was added. The mixture was extracted with Et<sub>2</sub>O (2 × 20 mL). The aqueous phase was acidified with aqueous HCl (1 M) to pH 2–3, and extracted with DCM (3 × 50 mL). Combined organic layers were dried over Na<sub>2</sub>SO<sub>4</sub>, filtered, concentrated to dryness to give the desired product **24** as a white solid (2.8 g, 95% yield). MS: 338 (M+1)<sup>+</sup>.

**Step B: (S)-(9H-fluoren-9-yl)methyl 2-(((S)-1-(2-chlorophenyl)-2-(3,3-difluorocyclobutylamino)-2-oxoethyl)(3-fluorophenyl)carbamoyl)pyrrolidine-1-carboxylate (25).** A mixture of 2-chlorobenzaldehyde (230 mg, 1.5 mmol) and 3-fluorobenzaniline (180 mg, 1.5 mmol) in MeOH (4 mL) was stirred at RT for 30 minutes. (S)-1-(((9H-fluoren-9-yl)-methoxy)-carbonyl)pyrrolidine-2-carboxylic acid **24** (500 mg, 1.5 mmol) was added and the reaction mixture stirred for 10 minutes. 1,1-Difluoro-3-isocyanocyclobutane (360 mg, 3.0 mmol) was added and the reaction mixture was stirred at RT overnight. The mixture was concentrated to dryness, and purified by chromatography eluting with DCM/acetone (V:V, 150:1 to 30:1), then with DCM/EtOAc (V:V, 1:1) to give the desired two isomers, (S)-(9H-fluoren-9-yl)methyl-2-(((R)-1-(2-chloro-phenyl)-2-(3,3-difluoro-cyclobutylamino)-2-oxo-ethyl)(3-fluorophenyl)carbamoyl)pyrrolidine-1-carboxylate (350 mg, 33% yield) and (S)-(9H-fluoren-9-yl)methyl-2-(((S)-1-(2-chloro-phenyl)-2-(3,3-difluorocyclo-butylamino)-2-oxoethyl)(3-fluorophenyl)carbamoyl)pyrrolidine-1-carboxylate (370 mg, 33% yield). MS: 688(M+1)<sup>+</sup>.

**Step C: (S)-N-((S)-1-(2-chlorophenyl)-2-(3,3-difluorocyclobutylamino)-2-oxoethyl)-N-(3-fluorophenyl)pyrrolidine-2-carboxamide (26).** (S)-(9H-fluoren-9-yl)methyl-2-(N-((S)-(3,3-difluoro-cyclobutylcarbamoyl)(2-chlorophenyl)methyl)-N-(3-fluorophenyl)carbamoyl)pyrrolidine-1-carboxylate **25** (370 mg, 0.53 mmol) was dissolved in CH<sub>3</sub>CN (5 mL). Piperidine (1 mL) was added dropwise. The mixture was stirred at 40°C overnight, then H<sub>2</sub>O (10 mL) was added. The resulting mixture was extracted with EtOAc (3 × 50 mL). Combined organic layers were dried over MgSO<sub>4</sub>, filtered, concentrated to dryness to give crude product **26** (145 mg, 57% yield). MS: 466 (M+1)<sup>+</sup>.

**Step D: Compound 4.** A mixture of (2S)-N-((S)-(3,3-difluorocyclobutylcarbamoyl)-(2-chlorophenyl)-methyl)-N-(3-fluorophenyl)pyrrolidine-2-carboxamide (40 mg, 0.08 mol), 2-bromo-pyrimidine (100 mg, 0.5 mmol), Pd<sub>2</sub>(dba)<sub>3</sub> (10 mg, 0.008 mmol), BINAP (10 mg, 0.012 mmol), sodium *tert*-butoxide (NaOtBu; 24 mg, 0.2 mmol) in toluene was stirred at 100°C under the atmosphere of N<sub>2</sub> overnight. The mixture was filtered, and then washed with EtOAc (3 × 20 mL). Combined organic layers were concentrated. The residue was purified by prep-TLC using petroleum ether/EtOAc (V:V, 3:2) then by DCM/acetone (V:V, 30:1) as eluent to give the desired compound **4** (10 mg, 23% yield). <sup>1</sup>H NMR (400 MHz, CDCl<sub>3</sub>): δ 8.309–8.298(m, 2H), 7.315–7.296(m, 1H), 7.151–7.108(m,3H), 7.305–6.948(m, 2H), 6.880–6.832(m,1H), 6.505–6.482(t, 1H), 6.430(s, 1H), 6.203–6.187(m, 1H), 4.417–4.385(m, 1H), 4.305–4.302(m, 1H), 3.770–3.645(m, 2H), 3.014–2.937(m, 2H), 2.509–2.351(m, 2H), 2.164–2.073(m, 2H), 1.974–1.835(m, 2H). HRMS (ESI) calculated for C<sub>27</sub>H<sub>25</sub>ClF<sub>3</sub>N<sub>5</sub>O<sub>2</sub> [M+ H]<sup>+</sup> 544.1727, found 544.1727.

*Compound 5 was prepared according the general procedure for the Ugi reaction:*

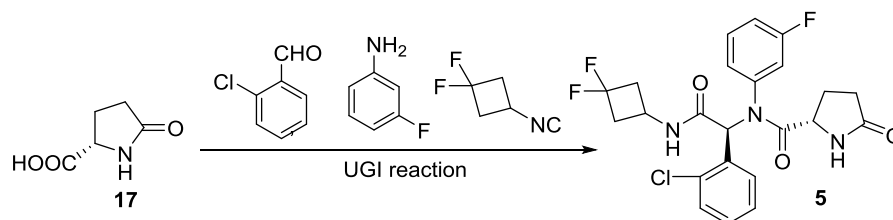

<sup>1</sup>H NMR (400 MHz, CDCl<sub>3</sub>) δ 8.88 (s, 1H), 7.31 (m, 7H), 6.86 (m, 1H), 6.34 (m, 1H), 4.13 (s, 1H), 4.01–3.72 (m, 1H), 3.31 (s, 1H), 3.05–2.77 (m, 2H), 2.55 (m, 1H), 2.42 (d, *J* = 9.1 Hz, 1H), 2.23–1.65 (m, 4H). HRMS (ESI) calculated for C<sub>23</sub>H<sub>21</sub>ClF<sub>3</sub>N<sub>3</sub>O<sub>3</sub> [M+ H]<sup>+</sup> 480.1302, found 480.1305.

Compound 6 was prepared according the general procedure for the Buchwald reaction:

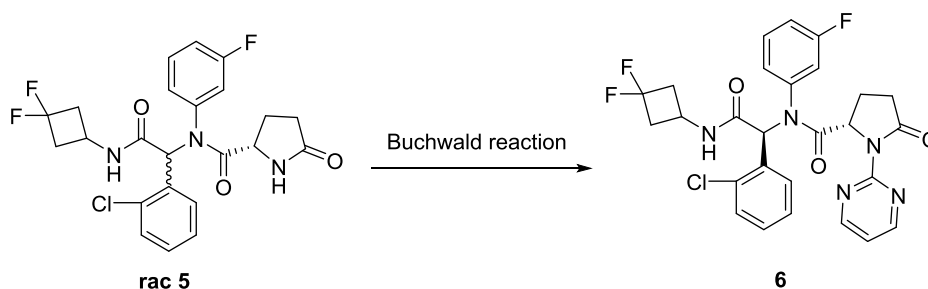

$^1\text{H}$  NMR (400 MHz,  $\text{CDCl}_3$ ):  $\delta$  8.69 (d,  $J = 4.8$  Hz, 2H), 7.71 (s, 1H), 7.31 (m, 1H), 7.18 (m, 1H), 7.13–6.77 (m, 6H), 6.46 (s, 1H), 6.22 (s, 1H), 5.00–4.62 (m, 1H), 4.35 (s, 1H), 3.19–2.71 (m, 3H), 2.69–1.83 (m, 5H). HRMS (ESI) calculated for  $\text{C}_{27}\text{H}_{23}\text{ClF}_3\text{N}_5\text{O}_3$  [ $\text{M} + \text{H}$ ] $^+$ 558.1520, found 558.1525.

Compound 8 was prepared according the general procedure for the Buchwald reaction:

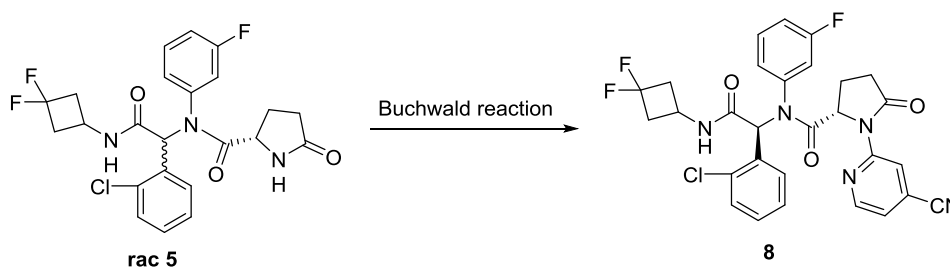

$^1\text{H}$  NMR (400 MHz,  $\text{CDCl}_3$ ):  $\delta$  8.74 (s, 1H), 8.52 (s, 1H), 7.72 (d,  $J = 7.1$  Hz, 1H), 7.43–7.33 (m, 1H), 7.25–7.17 (m, 1H), 7.13–6.81 (m, 4H), 6.43 (s, 1H), 6.12 (s, 1H), 4.92 (d,  $J = 6.8$  Hz, 1H), 4.37–4.28 (m, 1H), 3.10–2.82 (m, 3H), 2.59–2.49 (m, 2H), 2.42–2.36 (m, 1H), 2.31–2.22 (m, 1H), 2.06–1.88 (m, 2H). HRMS (ESI) calculated for  $\text{C}_{29}\text{H}_{23}\text{ClF}_3\text{N}_5\text{O}_3$  [ $\text{M} + \text{H}$ ] $^+$ 582.1520, found 582.1526.

Compound 7 was prepared according the general procedure for the Buchwald reaction:

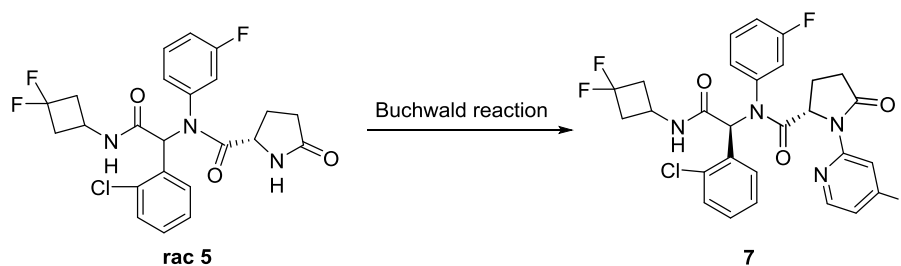

$^1\text{H}$  NMR (400 MHz,  $\text{CDCl}_3$ ):  $\delta$  8.32 (s, 1H), 8.17 (d,  $J = 11.2$  Hz, 1H), 7.06 (dd,  $J = 6, 3.2$  Hz, 1H), 7.33–6.82 (m, 7H), 6.42 (s, 1H), 6.34 (s, 2H), 4.93 (d,  $J = 4$  Hz, 1H), 4.34 (s, 1H),

3.05–2.80 (m, 3H), 2.55–2.37 (m, 3H), 2.42–2.36 (m, 1H), 2.21–2.16 (m, 1H), 2.03–1.97 (m, 1H). HRMS (ESI) calculated for  $C_{28}H_{23}ClF_4N_4O_3[M+H]^+$  575.1473, found 575.1469.

Compound AGI-14100 was prepared according to the general procedures for the Ugi reaction and the Buchwald reaction:

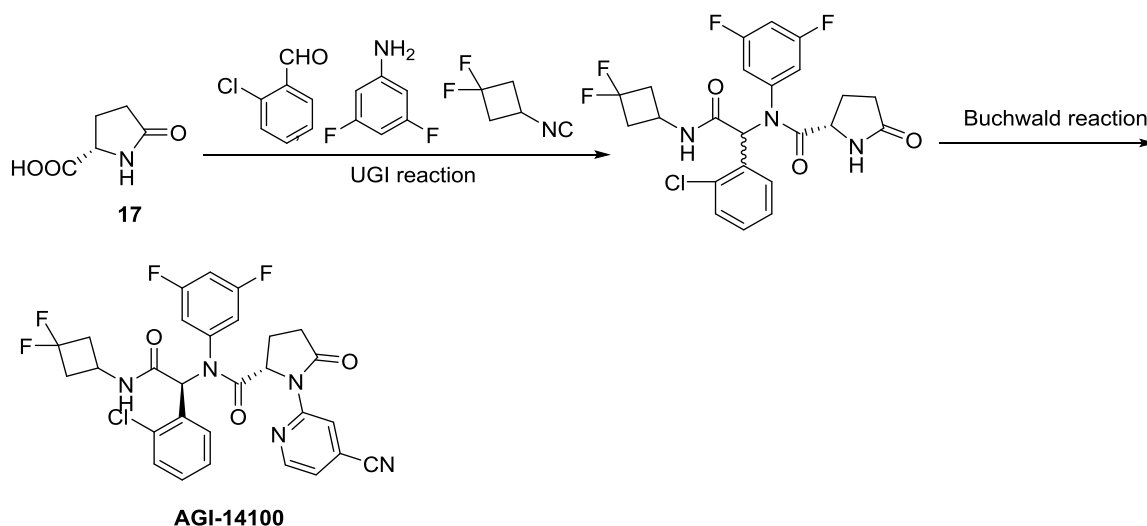

$^1H$  NMR (400 MHz,  $CDCl_3$ ):  $\delta$  8.73 (d,  $J = 7.1$  Hz, 1H), 8.60–8.46 (m, 1H), 7.56 (d,  $J = 7.7$  Hz, 1H), 7.38–7.32 (m, 1H), 7.31–7.27 (m, 1H), 7.26–7.18 (m, 1H), 7.14–7.00 (m, 1H), 6.96 (m, 1H), 6.85 (s, 1H), 6.69 (m, 1H), 6.40 (s, 1H), 6.02 (d,  $J = 6.6$  Hz, 1H), 4.98–4.74 (m, 1H), 4.39–4.10 (m, 1H), 3.11–2.67 (m, 3H), 2.64–1.95 (m, 5H). HRMS (ESI) calculated for  $C_{29}H_{22}ClF_4N_5O_3 [M+H]^+$  600.1426, found 600.1419.

Compound 9 was prepared according to the following scheme, using the following protocol:

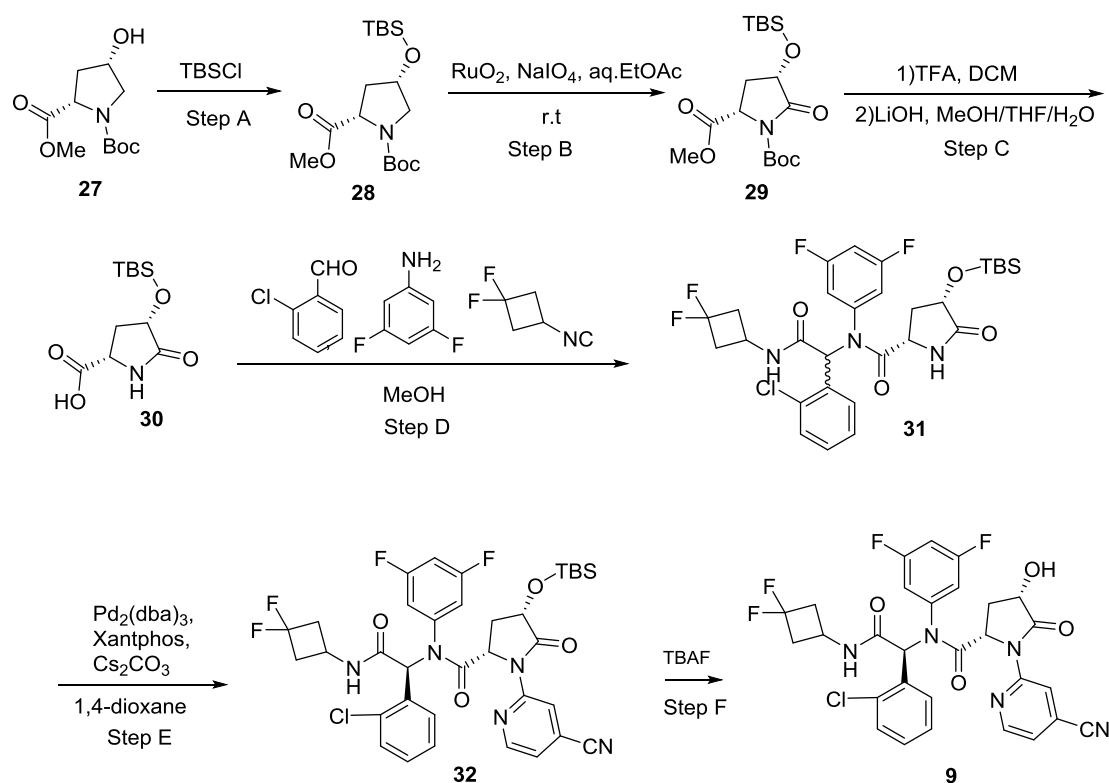

**Step A:** *(2S,4S)-1-tert-butyl 2-methyl 4-((tert-butyldimethylsilyl)oxy)pyrrolidine-1,2-dicarboxylate (28)*. Imidazole (2.8 g, 40.8 mmol) was added to a solution of *(2S,4S)-1-tert-butyl 2-methyl 4-hydroxypyrrolidine-1,2-dicarboxylate 27* (5.0 g, 20.4 mmol) and *tert-butyldimethylsilyl chloride (TBSCl; 4.6 g, 30.6 mmol)* in anhydrous dimethylformamide (DMF; 100 mL). The mixture was stirred at RT overnight. The resulting mixture was partitioned between EtOAc and H<sub>2</sub>O. The organic layer was separated, washed in sequence with aqueous LiCl (10%) and brine, dried over anhydrous Na<sub>2</sub>SO<sub>4</sub>, and then concentrated. The residue was purified by column chromatography (silica gel, 0–25% DCM in petroleum ether) to afford the desired product **28** (6.7 g, 91.5% yield) as colorless oil. MS: 360.2 (M+1)<sup>+</sup>.

**Step B:** *(2S,4S)-1-tert-butyl 2-methyl 4-((tert-butyldimethylsilyl)oxy)-5-oxopyrrolidine-1,2-dicarboxylate (29)*. To a solution of sodium periodate (NaIO<sub>4</sub>; 7.5 g, 35.0 mmol) in H<sub>2</sub>O (80 mL) was added ruthenium oxide (RuO<sub>2</sub>; 370 mg, 2.8 mmol) under nitrogen. The resulting green–yellow solution was stirred for 5 minutes followed by addition of *(2S,4S)-1-tert-butyl-2-methyl-4-((tert-butyldimethylsilyl)oxy)pyrrolidine-1,2-dicarboxylate 28* (5.0 g, 14.0 mmol) in EtOAc (44 mL) in one portion. The mixture was stirred at RT overnight. The resulting mixture was then diluted with EtOAc and filtered through a pad of Celite. The organic layer

was separated and washed with saturated aqueous NaHSO<sub>3</sub>, which resulted in precipitation of Ru black. The organic layer was then washed with brine and dried over anhydrous Na<sub>2</sub>SO<sub>4</sub>. Evaporation of the solvent gave the desired product **29** (4.8 g, 92.3% yield) as colorless oil. MS: 374.2 (M+1)<sup>+</sup>.

**Step C: (2S,4S)-4-((tert-butyldimethylsilyl)oxy)-5-oxopyrrolidine-2-carboxylic acid (14).**

TFA (6 mL) was added to a solution of (2S,4S)-1-tert-butyl 2-methyl 4-((tert-butyldimethylsilyl)oxy)-5-oxopyrrolidine-1,2-dicarboxylate **29** (2.5 g, 6.68 mmol) in DCM (18 mL) at 0°C. The mixture was stirred at RT for 1 hour, then concentrated. The residue was dissolved in MeOH/THF (10 mL/10 mL) followed by addition of a solution of LiOH (842 mg, 20.1 mmol) in H<sub>2</sub>O (5 mL). The resulting mixture was stirred at RT for 1 hour and then partitioned between EtOAc and H<sub>2</sub>O. The aqueous layer was separated and then pH adjusted to 6 by 1N HCl aqueous and extracted with EtOAc (20 mL × 3). The combined organic layers were washed with brine, dried over anhydrous Na<sub>2</sub>SO<sub>4</sub>, and then concentrated to afford the desired product **30** (1.3 g, 75.1% yield) as a white solid. <sup>1</sup>H NMR (400 MHz, DMSO-d<sub>6</sub>): δ 12.87 (s, 1H), 8.17 (s, 1H), 4.21 (t, *J* = 8.0 Hz, 1H), 4.02 (d, *J* = 8.4 Hz, 1H), 2.39–2.23 (m, 1H), 2.09 (m, 1H), 0.84 (s, 9H), 0.07 (s, 6H). MS: 260.1 (M+1)<sup>+</sup>.

**Step D: The same as general procedure for Ugi reaction set forth above.**

**Step E: The same as general procedure for Buchwald reaction set forth above.**

**Step F: (2S,4S)-4-((tert-butyldimethylsilyl)oxy)-N-((S)-1-(2-chlorophenyl)-2-((3,3-difluorocyclobutyl)amino)-2-oxoethyl)-1-(4-cyanopyridin-2-yl)-N-(3,5-difluorophenyl)-5-oxopyrrolidine-2-carboxamide (9).** Tetrabutylammonium fluoride (TBAF) in THF (1N, 0.3 mL) was added to a solution of (2S,4S)-4-((tert-butyldimethylsilyl)oxy)-N-((S)-1-(2-chlorophenyl)-2-((3,3-difluorocyclobutyl)amino)-2-oxoethyl)-1-(4-cyanopyridin-2-yl)-N-(3,5-difluorophenyl)-5-oxopyrrolidine-2-carboxamide (0.15 mmol) in THF at 0°C and the reaction solution was stirred at this temperature for 20 minutes. The resulting mixture was concentrated and the residue was purified by prep-TLC (6% MeOH in DCM) to afford the desired product **9**. <sup>1</sup>H NMR (400 MHz, CDCl<sub>3</sub>): δ 8.68 (s, 1H), 8.52 (d, *J* = 5.0 Hz, 1H), 7.60 (d, *J* = 8.2 Hz, 1H), 7.45–7.17 (m, 4H), 7.15–6.91 (m, 2H), 6.84 (d, *J* = 8.7 Hz, 1H), 6.69 (t, *J* = 8.7 Hz, 1H), 6.54–6.36 (m, 2H), 4.87–4.60 (m, 1H), 4.31 (m, 2H), 3.99–3.77 (m, 1H), 3.15–2.78 (m, 2H), 2.62–2.26 (m, 3H), 2.26–2.08 (m, 1H). HRMS (ESI) calculated for C<sub>29</sub>H<sub>22</sub>ClF<sub>4</sub>N<sub>5</sub>O<sub>4</sub> [M+ H]<sup>+</sup> 616.1375, found 616.1377.



Compound 10 was prepared following the procedure for Compound 9:

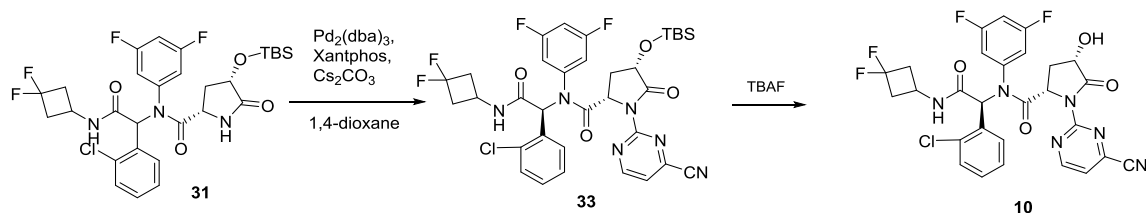

$^1\text{H}$  NMR (400 MHz,  $\text{CD}_3\text{OD}$ ):  $\delta$  8.97 (d,  $J = 4.9$  Hz, 1H), 7.68 (d,  $J = 4.8$  Hz, 1H), 7.61 (d,  $J = 9.2$  Hz, 1H), 7.42 (d,  $J = 7.2$  Hz, 1H), 7.25 (td,  $J = 7.8, 1.5$  Hz, 1H), 7.11 (t,  $J = 7.2$  Hz, 1H), 7.00 (dd,  $J = 13.3, 5.5$  Hz, 2H), 6.90 (m, 1H), 6.47 (s, 1H), 4.82 (m, 1H), 4.36 (t,  $J = 9.2$  Hz, 1H), 4.21 (dd,  $J = 14.9, 7.2$  Hz, 1H), 2.98–2.80 (m, 2H), 2.73–2.33 (m, 3H), 2.04–1.84 (m, 1H). Integration (19) for  $\text{C}_{28}\text{H}_{21}\text{ClF}_4\text{N}_6\text{O}_4$  due to two active protons (NH and OH) not shown in MeOD. HRMS (ESI) calculated for  $\text{C}_{28}\text{H}_{21}\text{ClF}_4\text{N}_6\text{O}_4$   $[\text{M} + \text{H}]^+$  617.1327, found 617.1322.

Compound 11 was prepared according to the following scheme:

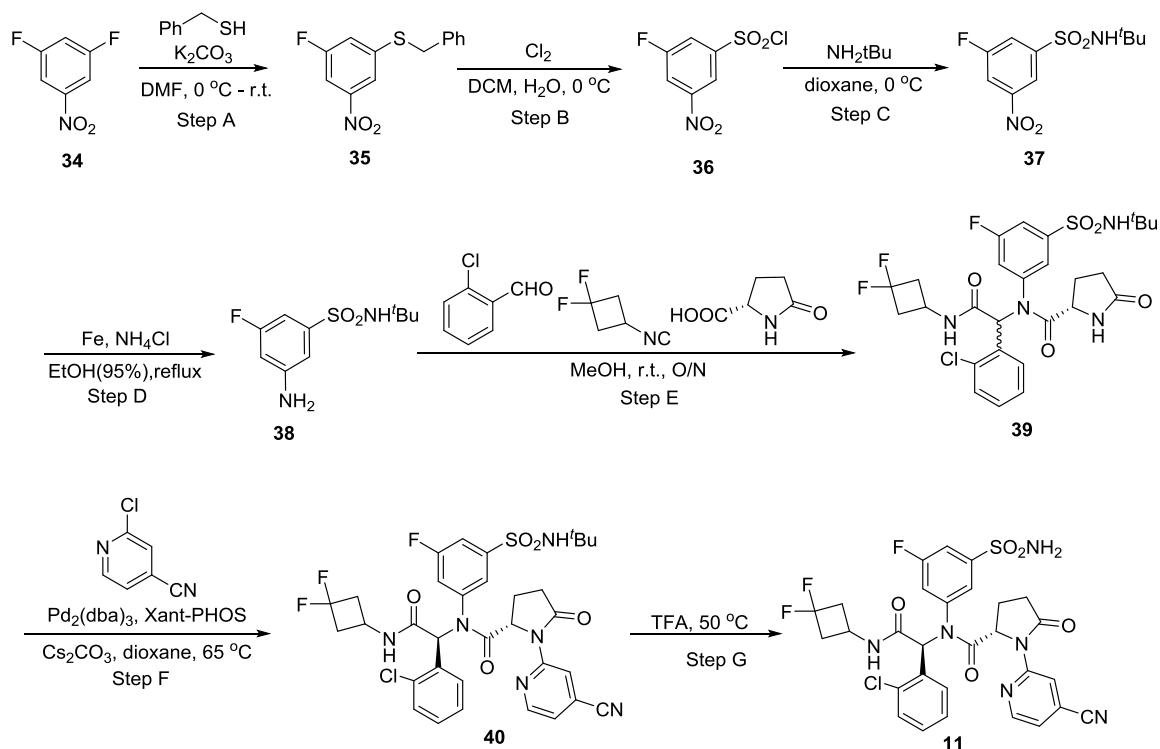

**Step A: Benzyl(3-fluoro-5-nitrophenyl)sulfane (35).** To a solution of 1, 3-difluoro-5-nitrobenzene **34** (15.9 g, 100 mmol) in DMF (160 mL) was added  $\text{K}_2\text{CO}_3$  (15.8 g, 110 mmol)

and phenylmethanethiol (Ph-SH; 12.4 g, 100 mmol) at 0°C. The mixture was stirred at RT for 2 hours. The resulting mixture was concentrated in high vacuo to afford the crude product **35** as yellow oil, which was used for the next step without further purification.

**Step B: 3-Fluoro-5-nitrobenzene-1-sulfonyl chloride (36).** Benzyl(3-fluoro-5-nitrophenyl)sulfane **35** (3.0 g) was dissolved in DCM (30 mL). To this solution, deionized H<sub>2</sub>O (30 mL) was added. Then chlorine was bubbled slowly into the stirred reaction mixture until the complete consumption of the starting material as monitored by TLC. The organic layer was separated, washed with saturated aqueous Na<sub>2</sub>S<sub>2</sub>O<sub>3</sub> solution, dried and concentrated to afford the crude product **36**, which was used for the next step without further purification.

**Step C: N-tert-butyl-3-fluoro-5-nitrobenzenesulfonamide (37).** 3-Fluoro-5-nitrobenzene-1-sulfonyl chloride **36** was dissolved in dry dioxane (30 mL). The solution was cooled to 0°C, and *tert*-butylamine (NH<sub>2</sub>tBu; 10 mL) was slowly added, after which the mixture was warmed to RT and stirred for 2 hours. The mixture was concentrated and the residue was purified by column chromatography (silica gel, MeOH/DCM = 0:100 to 10:90) to afford the desired product **37** (2.2 g, 70% yield). <sup>1</sup>H NMR (400 MHz, DMSO-d<sub>6</sub>): δ 8.43 (s, 1H), 8.40–8.32 (m, 1H), 8.10–8.05 (m, 1H), 7.99 (s, 1H), 1.12 (s, 9H).

**Step D: 3-Amino-N-tert-butyl-5-fluorobenzenesulfonamide (38).** *N-tert*-butyl-3-fluoro-5-nitrobenzenesulfonamide **37** (1.0 g, 3.6 mmol), iron powder (1.0 g, 18 mmol) and NH<sub>4</sub>Cl (1.0 g, 18 mmol) were mixed in EtOH (95%, 10 mL). The mixture was refluxed for 16 hours then filtered. The filtrate was concentrated and the residue was purified by column chromatography to afford the desired product **38** (0.62 g, 70% yield). <sup>1</sup>H NMR (400 MHz, DMSO-d<sub>6</sub>): δ 7.45 (s, 1H), 6.88–6.85 (m, 1H), 6.66–6.62 (m, 1H), 6.48–6.42 (m, 1H), 5.89 (s, 2H), 1.11 (s, 9H).

**Step E: The same as general procedures for Ugi reaction set forth above.**

**Step F: The same as general procedures for Buchwald reaction set forth above.**

**Step G: (S)-N-((S)-1-(2-chlorophenyl)-2-(3,3-difluorocyclobutylamino)-2-oxoethyl)-1-(4-cyanopyridin-2-yl)-N-(3-fluoro-5-sulfamoylphenyl)-5-oxopyrrolidine-2-carboxamide (11).** (2S)-N-(3-(*N-tert*-butylsulfamoyl)-5-fluorophenyl)-N-(1-(2-chlorophenyl)-2-(3,3-difluorocyclo-butylamino)-2-oxoethyl)-1-(4-cyanopyridin-2-yl)-5-oxopyrrolidine-2-carboxamide **40** (80 mg, 0.11 mmol) was dissolved in TFA (1 mL). The solution was stirred at RT for 16 hours and neutralized with saturated aqueous NaHCO<sub>3</sub>. The mixture was then

extracted with EtOAc (10 mL  $\times$  3). Combined organic layers were dried and concentrated. The residue was purified by prep-TLC to afford **11** (34 mg, 46% yield).  $^1\text{H}$  NMR (400 MHz, DMSO- $d_6$ ):  $\delta$  8.90–8.84 (m, 1H), 8.67–8.62 (m, 1H), 8.55 (s, 1H), 8.19 (s, 1H), 7.87–7.76 (m, 1H), 7.65–7.60 (m, 2H), 7.45–7.40 (m, 3H), 7.21 (d,  $J$  = 7.0 Hz, 2H), 7.11–7.04 (m, 1H), 6.93–6.86 (m, 1H), 6.33–6.26 (m, 1H), 4.83 (m, 1H), 4.13 (s, 1H), 2.94 (m, 2H), 2.63–2.53 (m, 3H), 2.42–2.32 (m, 1H), 1.97 (s, 2H). HRMS (ESI) calculated for  $\text{C}_{29}\text{H}_{24}\text{ClF}_3\text{N}_6\text{O}_5\text{S}$  [ $\text{M} + \text{H}$ ] $^+$  661.1248, found 661.1262.

*Compound AG-120 was prepared according to the following scheme, using the following protocol:*

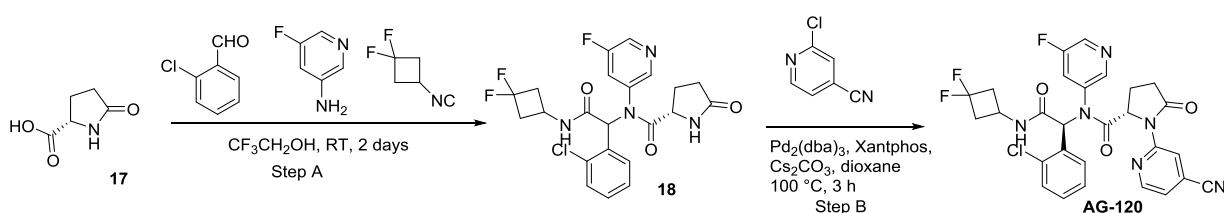

**Step A: 2-(2-chlorophenyl)-N-(3,3-difluorocyclobutyl)-3-(5-fluoropyridin-3-yl)-4-oxo-4-((S)-5-oxopyrrolidin-2-yl)butanamide (18).** A mixture of 2-chlorobenzaldehyde (230 g, 1.64 mol) and 5-fluoropyridin-3-amine (184 g, 1.64 mol) in  $\text{CF}_3\text{CH}_2\text{OH}$  (1.64 L) was stirred at RT for 30 minutes. (S)-5-oxopyrrolidine-2-carboxylic acid **17** (212 g, 1.64 mol) was added and the reaction mixture stirred for 10 minutes. 1,1-difluoro-4-isocyanocyclohexane (192 g, 1.64 mol) was then added and the reaction mixture was stirred at RT for 2 days. The mixture was concentrated, and then the residue was purified by column chromatography on silica gel eluted with DCM/MeOH (100:1 to 20:1) to afford the desired product **18** (360 g, 45.8% yield).

**Step B: Compound AG-120.**  $\text{Pd}_2(\text{dba})_3$  (17 g, 18.6 mmol) was added to a solution of 2-(2-chlorophenyl)-N-(3,3-difluorocyclobutyl)-3-(5-fluoropyridin-3-yl)-4-oxo-4-((S)-5-oxopyrrolidin-2-yl)butanamide **18** (355 g, 0.74 mol), 2-chloroisocyanonitrile (123 g, 0.89 mol),  $\text{Cs}_2\text{CO}_3$  (290 g, 0.89 mol) and Xantphos (21 g, 36.3 mmol) in 1,4-dioxane (4 L) and stirred at 100°C for 3 hours. The mixture was filtered and the filtrate was concentrated, then the diastereomeric residue was separated by column chromatography on silica gel and eluted with DCM/EtOAc (100:1 to 4:1) to give the desired isomer, which was then further purified by crystallization from EtOAc to get the desired product **AG-120** (95 g, 22% yield, 99.7 %*de*) as a white solid.  $^1\text{H}$  NMR (400 MHz,  $\text{CDCl}_3$ ):  $\delta$  9.01–8.49 (*m*, 2.5H), 8.36–8.11 (*m*, 2.2H), 7.33 (d,  $J$  = 8.0 Hz, 1H), 7.25 (*m*, 1.3H), 7.21 (t,  $J$  = 7.8 Hz, 1H), 6.91 (*m*, 1H),

6.48–6.41 (m, 1H), 6.30–6.21 (m, 1H), 4.82 (m, 1H), 4.38–4.30 (m, 1H), 3.11–2.74 (m, 3H), 2.61–1.91 (m, 5H); integration (21) for C<sub>28</sub>H<sub>22</sub>ClF<sub>3</sub>N<sub>6</sub>O<sub>3</sub> due to one active proton (NH) not shown in CDCl<sub>3</sub>. HRMS (ESI) calculated for C<sub>28</sub>H<sub>22</sub>ClF<sub>3</sub>N<sub>6</sub>O<sub>3</sub> [M+ H]<sup>+</sup> 583.1472, found 583.1477.

## Abbreviations

2-HG: D-2-hydroxyglutarate

α-KG: alpha-ketoglutarate

ADME: absorption, distribution, metabolism, and excretion

AML: acute myeloid leukemia

B-ME: beta-mercaptoethanol

BINAP: (2,2'-bis(diphenylphosphino)-1,1'-binaphthyl)

BM: bone marrow

Boc: tert-butyloxycarbonyl

BSA: bovine serum albumin

CLp: clearance

CYP: cytochrome P450

Dbal: dibenzylideneacetone

DCM: dichloromethane

DMF: dimethylformamide

DMSO: dimethylsulfoxide

E<sub>h</sub>: hepatic extraction ratio

Enz: enzymatic

Et<sub>2</sub>O: diethyl ether

EtOAc: ethyl acetate

EtOH: ethanol

ESI: electrospray ionization

F: bioavailability

FAB: French-American-British

FBS: fetal bovine serum

Fmoc: fluorenylmethyloxycarbonyl

FSC: forward scatter

GBM: glioblastoma multiforme

<sup>1</sup>H NMR: proton nuclear magnetic resonance

HRMS: high-resolution mass spectrometry

HPLC: high-performance liquid chromatography

hPXR: human pregnane X receptor

IC<sub>50</sub>: half-maximal (50%) inhibitory concentration

IC<sub>90</sub>: 90% inhibitory concentration

IDH: isocitrate dehydrogenase

IV: intravenous  
k<sub>obs</sub>: observed rate constant  
LC-MS/MS: liquid chromatography–tandem mass spectrometry  
MeCN: acetonitrile  
MeOH: methanol  
mIDH: mutant isocitrate dehydrogenase  
MSKCC: Memorial Sloan Kettering Cancer Center  
NaOtBu: sodium *tert*-butoxide  
ND: not determined  
NMR: nuclear magnetic resonance  
PB: peripheral blood  
Pd<sub>2</sub>(dba)<sub>3</sub>: tris(dibenzylideneacetone)dipalladium(0)  
PK: pharmacokinetic  
PO: oral  
PPh<sub>3</sub>: triphenylphosphine  
prep-TLC: preparative thin-layer chromatography  
QCs: quality control samples  
RPMI: Roswell Park Memorial Institute  
SSC: side scatter  
t<sub>1/2</sub>: half-life  
TBAF: tetrabutylammonium fluoride  
TBSCl: *tert*-Butyldimethylsilyl chloride  
TEA: trimethylamine  
TFA: trifluoroacetic acid  
THF: tetrahydrofuran  
TLC: thin-layer chromatography  
tPSA: total polar surface area  
WHO: World Health Organization  
WT: wild type  
Xantphos: 4,5-Bis(diphenylphosphino)-9,9-dimethylxanthene

### **Full Conflict of Interest Statement**

Janeta Popovici-Muller: Agios Pharmaceuticals, Inc. – prior employment, stock/shareholder, patents. Decibel Therapeutics – employment.

René M. Lemieux: Agios Pharmaceuticals, Inc. – prior employment, stock/shareholder, patents. KSQ Therapeutics – employment.

Erin Artin: Agios Pharmaceuticals, Inc. – prior employment, stock/shareholder. KSQ Therapeutics – employment, stock/shareholder.

Jeffrey Saunders: Agios Pharmaceuticals, Inc. – prior employment, patents. KSQ Therapeutics – advisory board. Praxis Medicines – consultancy. SV Health – consultancy.

Francesco G. Salituro: Agios Pharmaceuticals, Inc. – prior employment, stock/shareholder. Sage Therapeutics – employment.

Jeremy Travins: Agios Pharmaceuticals, Inc. – prior employment, stock/shareholder, patents. Shire – employment.

Giovanni Cianchetta: Agios Pharmaceuticals, Inc. – employment, stock/shareholder, patents.

Zhenwei Cai: PharmaResources – employment, patents (as coinventor).

Ding Zhou: PharmaResources – prior employment. GSK R&D Shanghai – employment.

Dawei Cui: PharmaResources – prior employment.

Ping Chen: PharmaResources – employment.

Kimberly Straley: Agios Pharmaceuticals, Inc. – prior employment, stock/shareholder. Vertex Pharmaceuticals – employment.

Erica Tobin: Agios Pharmaceuticals, Inc. – prior employment, stock/shareholder. KSQ Therapeutics – employment.

Fang Wang: Agios Pharmaceuticals, Inc. – employment, stock/shareholder.

Muriel D. David: INSERM/AVIESAN, French National Cancer League (LNCC), French National Cancer Association (ARC) – funding to institution. Agios Pharmaceuticals, Inc. – travel/accommodation expenses. Celgene – travel/accommodation expenses.

Virginie Penard-Lacronique: INSERM/AVIESAN, French National Cancer League (LNCC), French National Cancer Association (ARC) – funding to institution. Celgene – travel/accommodation expenses.

Cyril Quivoron – no competing financial interest.

Véronique Saada – no competing financial interest.

Stéphane de Botton: Agios Pharmaceuticals, Inc. – advisory board member, research funding, travel/accommodation expenses. Celgene – advisory board member, research funding, travel/accommodation expenses. Pfizer – advisory board member, travel/accommodation expenses. Novartis – advisory board member, travel/accommodation expenses. Servier – advisory board member. Pierre Fabre – advisory board member, travel/accommodation expenses.

Stefan Gross: Agios Pharmaceuticals, Inc. – employment, stock/shareholder.

Lenny Dang: Agios Pharmaceuticals, Inc. – employment, stock/shareholder.

Hua Yang: Agios Pharmaceuticals, Inc. – employment, stock/shareholder.

Luke Utley: Agios Pharmaceuticals, Inc. – prior employment, stock/shareholder. Alnylam Pharmaceuticals – prior employment. Spero Therapeutics – employment, stock/shareholder.

Yue Chen: Agios Pharmaceuticals, Inc. – employment, stock/shareholder.

Hyeryun Kim: Agios Pharmaceuticals, Inc. – employment, stock/shareholder.

Shengfang Jin: Agios Pharmaceuticals, Inc. – employment, stock/shareholder.

Zhiwei Gu: ChemPartner – employment.

Gui Yao: ChemPartner – employment.

Zhiyong Luo: ChemPartner – employment.

Xiaobing Lv: ChemPartner – employment.

Cheng Fang: ChemPartner – employment.

Liping Yan: ChemPartner – employment.

Andrew Olaharski: Agios Pharmaceuticals, Inc. – prior employment, stock/shareholder.  
Akebia Therapeutics – employment.

Lee Silverman: Agios Pharmaceuticals, Inc. – employment, stock/shareholder.

Scott Biller: Agios Pharmaceuticals, Inc. – employment, stock/shareholder. Syros  
Pharmaceuticals, Inc. – advisory board.

Shin-San M. Su: Agios Pharmaceuticals, Inc. – prior employment, stock/shareholder,  
consultancy. Decibel Therapeutics – employment.

Katharine Yen: Agios Pharmaceuticals, Inc. – employment, stock/shareholder.

## References

- (1) Rendina, A. R.; Pietrak, B.; Smallwood, A.; Zhao, H.; Qi, H.; Quinn, C.; Adams, N. D.; Concha, N.; Duraiswami, C.; Thrall, S. H.; Sweitzer, S.; Schwartz, B. Mutant IDH1 enhances the production of 2-hydroxyglutarate due to its kinetic mechanism. *Biochemistry (Mosc)*. **2013**, 52 (26), 4563-77.
- (2) Itsumi, M.; Inoue, S.; Elia, A. J.; Murakami, K.; Sasaki, M.; Lind, E. F.; Brenner, D.; Harris, I. S.; Chio, II; Afzal, S.; Cairns, R. A.; Cescon, D. W.; Elford, A. R.; Ye, J.; Lang, P. A.; Li, W. Y.; Wakeham, A.; Duncan, G. S.; Haight, J.; You-Ten, A.; Snow, B.; Yamamoto, K.; Ohashi, P. S.; Mak, T. W. Idh1 Protects Murine Hepatocytes from Endotoxin-induced Oxidative Stress by Regulating the Intracellular NADP(+)/NADPH Ratio. *Cell Death Differ*. **2015**, 22 (11), 1837-45.
- (3) Mitelman, F. *An International System for Human Cytogenetic Nomenclature. Recommendations of the International Standing Committee on Human Cytogenetic Nomenclature, Memphis, Tenn., October 1994*. Karger: New York, 1995.
- (4) Yen, K.; Travins, J.; Wang, F.; David, M. D.; Artin, E.; Straley, K.; Padyana, A.; Gross, S.; DeLaBarre, B.; Tobin, E.; Chen, Y.; Nagaraja, R.; Choe, S.; Jin, L.; Konteatis, Z.; Cianchetta, G.; Saunders, J. O.; Salituro, F. G.; Quivoron, C.; Opolon, P.; Bawa, O.; Saada, V.; Paci, A.; Broutin, S.; Bernard, O. A.; de Botton, S.; Marteyn, B. S.; Pilichowska, M.; Xu, Y.; Fang, C.; Jiang, F.; Wei, W.; Jin, S.; Silverman, L.; Liu, W.; Yang, H.; Dang, L.; Dorsch, M.; Penard-Lacronique, V.; Biller, S. A.; Su, S. M. AG-221, a First-in-Class Therapy Targeting Acute Myeloid Leukemia Harboring Oncogenic IDH2 Mutations. *Cancer Discov* **2017**, 7 (5), 478-493.
- (5) Dang, L.; White, D. W.; Gross, S.; Bennett, B. D.; Bittinger, M. A.; Driggers, E. M.; Fantin, V. R.; Jang, H. G.; Jin, S.; Keenan, M. C.; Marks, K. M.; Prins, R. M.; Ward, P. S.; Yen, K. E.; Liau, L. M.; Rabinowitz, J. D.; Cantley, L. C.; Thompson, C. B.; Vander Heiden, M. G.; Su, S. M. Cancer-associated IDH1 Mutations Produce 2-Hydroxyglutarate. *Nature* **2009**, 462 (7274), 739-744.

- (6) Boissel, N.; Nibourel, O.; Renneville, A.; Huchette, P.; Dombret, H.; Preudhomme, C. Differential Prognosis Impact of IDH2 Mutations in Cytogenetically Normal Acute Myeloid Leukemia. *Blood* **2011**, *117* (13), 3696-3697.
- (7) Boissel, N.; Nibourel, O.; Renneville, A.; Gardin, C.; Reman, O.; Contentin, N.; Bordessoule, D.; Pautas, C.; de Revel, T.; Quesnel, B.; Huchette, P.; Philippe, N.; Geffroy, S.; Terre, C.; Thomas, X.; Castaigne, S.; Dombret, H.; Preudhomme, C. Prognostic Impact of Isocitrate Dehydrogenase Enzyme Isoforms 1 and 2 Mutations in Acute Myeloid Leukemia: a Study by the Acute Leukemia French Association group. *J. Clin. Oncol.* **2010**, *28* (23), 3717-3723.
- (8) Ugi, I.; Meyr, R.; Fetzer, U.; Steinbruckner, C. Studies on Isonitriles. *Angew. Chem.* **1959**, *71*, 386.
- (9) Ugi, I.; Steinbruckner, C. Concerning a New Condensation Principle. *Angew. Chem.* **1960**, *72*, 267-268.
- (10) Ugi, I. The  $\alpha$ -Addition of Immonium Ions and Anions to Isonitriles Coupled With Secondary Reactions. *Angew. Chem.* **1962**, *74*, 9-22.
- (11) Ugi, I. The Four Component Synthesis. *Peptides (New York, 1979-1987)* **1980**, *2*, 365-381.
- (12) Ugi, I.; Marquarding, D.; Urban, R., Synthesis of Peptides by Four-Component Condensation. In *Chemistry and Biochemistry of Amino Acids, Peptides, and Proteins*, Weinstein, B., Ed. Marcel Dekker: New York, 1982; pp 245-289.
- (13) Ugi, I.; Lohberger, S.; Karl, R., The Passerini and Ugi Reactions. In *Comprehensive Organic Synthesis*, Trost, B.; Fleming, I., Eds. Pergamon Press: Oxford, 1991; pp 1083-1109.
- (14) Domling, A.; Ugi, I. I. Multicomponent Reactions with Isocyanides. *Angew. Chem. Int. Ed. Engl.* **2000**, *39* (18), 3168-3210.
- (15) Ugi, I.; Dömling, A., Multi-Component Reactions (MCRs) of Isocyanides and Their Chemical Libraries. In *Combinatorial Chemistry: A Practical Approach*, Fenniri, H., Ed. Oxford University Press: Oxford, 2000; pp 287-302.
- (16) Guram, A. S.; Rennels, R. A.; Buchwald, S. L. A Simple Catalytic Method for the Conversion of Aryl Bromides to Arylamines. *Angew. Chem. Int. Ed. Engl.* **1995**, *34*, 1348-1350.
- (17) Guram, A. S.; Rennels, R. A.; Buchwald, S. L.; Barta, N. S.; Pearson, W. H. Palladium-Catalyzed Amination of Aryl Halides With Amines. *Chemtracts: Inorg. Chem.* **1996**, *8*, 1-5.
- (18) Hartwig, J. F. Palladium-Catalyzed Amination of Aryl Halides. Mechanism and Rational Catalyst Design. *Synlett* **1997**, *4*, 329-340.
- (19) Jiang, L.; Buchwald, S. L., Palladium-Catalyzed Aromatic Carbon-Nitrogen Bond Formation. In *Metal-Catalyzed Cross-Coupling Reactions*, 2nd ed.; de Meijere, A.; Diederich, F., Eds. Wiley-VCH: Weinheim, Germany, 2004; pp 699-760.
